# Supplementary material for: Reactivity of surface oxygen vacancy sites and frustrated Lewis acid–base pairs of In2O3 catalysts in CO2 hydrogenation
Source: Royal Society of Chemistry journal article supplement (doi:10.1039/d4cp00895b), 2024-01-01
Supplement: d4cp00895b1.pdf [file d4cp00895b1.pdf]

**Electronic Supplementary Information**

**Reactivity of surface oxygen vacancy sites and frustrated Lewis acid-base  
pairs of  $\text{In}_2\text{O}_3$  catalyst in  $\text{CO}_2$  hydrogenation †**

Zhangqian Wei,<sup>ab</sup> Shenggang Li,<sup>\*abc</sup> Peng Gao<sup>\*ab</sup>

<sup>a</sup> *CAS Key Laboratory of Low-Carbon Conversion Science and Engineering, Shanghai  
Advanced Research Institute, Chinese Academy of Sciences, 100 Haik Road, Shanghai  
201210, China.*

<sup>b</sup> *University of Chinese Academy of Sciences, Beijing 100049, China*

<sup>c</sup> *School of Physical Science and Technology, ShanghaiTech University, Shanghai 201210,  
China*

\* E-mail addresses: [gaopeng@sari.ac.cn](mailto:gaopeng@sari.ac.cn) (P. Gao), [lisg@sari.ac.cn](mailto:lisg@sari.ac.cn) (S. Li),

## Computational details

All periodic density functional theory (DFT) calculations were carried out with the Vienna ab initio simulation package (VASP)<sup>1,2</sup> using the Perdew–Burke–Ernzerhof (PBE)<sup>3</sup> exchange–correlation functional and the projector-augmented wave (PAW) potentials<sup>4</sup>. An energy cut-off of 400 eV, and a force convergence of 0.03 eV/Å on all unconstrained atoms were enforced. Gaussian smearing with a smearing width of 0.05 eV was used, and the electronic energy of the supercell was converged to 10<sup>-4</sup> eV. In our previous works<sup>5,6,7</sup>, results from the PBE calculations are in good agreement with the available experimental results, suggesting the PBE functional to be suitable for studying reactivity of the In<sub>2</sub>O<sub>3</sub> surface. Here, accuracy of the computational results using these parameters is also found to be sufficient. Transition state (TS) structures were located using the nudged elastic band (NEB) method<sup>8</sup>. The initial images were generated using the Image Dependent Pair Potential procedure<sup>9</sup> as implemented in the Atomic Simulation Environment (ASE) package.

The In<sub>2</sub>O<sub>3</sub>(110) and (111) surfaces were built from the optimized primitive unit cell (PUC) of c-In<sub>2</sub>O<sub>3</sub> with lattice parameters of a = 10.21 Å, b = 14.44 Å and c = 15.99 Å. The In<sub>2</sub>O<sub>3</sub>(110) surface was modeled with a rectangular p(1×√2) supercell with four repeated layers, and was optimized using a Γ-centered Monkhorst–Pack<sup>10</sup> (4×3×1) k-point mesh. The In<sub>2</sub>O<sub>3</sub>(111) surface was modeled with a p(1×1) supercell with three repeated layers, and was optimized using a Γ-centered Monkhorst–Pack (3×3×1) k-point mesh. These catalyst models are shown in Figure 1(a, b), where the distinct V<sub>O</sub> and In sites are labeled. In sites near the V<sub>O</sub> sites on the In<sub>2</sub>O<sub>3</sub> surface and the adjacent OH groups form SFLPs, so four different SFLPs adjacent to the V<sub>O4</sub> and V<sub>O3</sub> sites on the In<sub>2</sub>O<sub>3</sub>(110) surface and three different SFLPs adjacent to the V<sub>O4</sub> site on the In<sub>2</sub>O<sub>3</sub>(111) surface were considered, as shown in Figure 1(c, d). The formation energies of the different V<sub>O</sub> sites on the In<sub>2</sub>O<sub>3</sub> surfaces and the adsorption energies of CO<sub>2</sub> and CH<sub>2</sub> at the different V<sub>O</sub> sites were calculated. The energy barriers of CO and HCOO formations were also calculated. Effects of V<sub>O</sub> formation energy on the adsorption energies, energy barriers of CO and HCOO formations, and effects of SFLPs on the CO<sub>2</sub> hydrogenation reaction were examined.

V<sub>O</sub> formation energy refers to the energy required to generate a specific V<sub>O</sub> site on a given surface, denoted as ΔE<sub>f,V<sub>O</sub></sub>, which can be calculated from the following equation:

$$\Delta E_{f,V_O} = E_{V_O} + \frac{1}{2}E_{O_2} - E_{Surface}$$

Here, E<sub>V<sub>O</sub></sub> is the energy of the surface with the specified V<sub>O</sub> site, E<sub>O<sub>2</sub></sub> is the energy of an isolated O<sub>2</sub> molecule, and E<sub>Surface</sub> is the energy of the surface before V<sub>O</sub> formation.

The adsorption energy of CX<sub>2</sub> (X = H, O), denoted by E<sub>ads,CX<sub>2</sub></sub>, indicates the adsorption strength of CX<sub>2</sub> on the surface, where CX<sub>2</sub> is adsorbed at the V<sub>O</sub> site, and

can be calculated from the following equation:

$$E_{\text{ads,CX}_2} = E_{\text{CX}_2^*} - E_{\text{CX}_2} - E_{\text{V}_0}$$

Here,  $E_{\text{CX}_2^*}$  is the energy of the surface after the adsorption of  $\text{CX}_2$ , and  $E_{\text{CX}_2}$  is the energy of an isolated  $\text{CX}_2$  molecule.

The energy barrier of an elementary reaction, for example direct  $\text{CO}_2$  dissociation to  $\text{CO}$  or  $\text{CO}_2$  hydrogenation to  $\text{HCOO}$ , is denoted as  $E_a$ , and can be calculated from the following equation:

$$E_a = E_{\text{TS}} - E_{\text{IS}}$$

Here,  $E_{\text{TS}}$  is the energy of the transition state, and  $E_{\text{IS}}$  is the energy of the initial state.

### Notes and References

1. G. Kresse and J. Furthmuller, *Comput Mater Sci*, 1996, **6**, 15-50.
2. G. Kresse and J. Furthmuller, *Phys Rev B*, 1996, **54**, 11169-11186.
3. J. P. Perdew, K. Burke and M. Ernzerhof, *Phys Rev Lett*, 1996, **77**, 3865-3868.
4. G. Kresse and D. Joubert, *Phys Rev B*, 1999, **59**, 1758-1775.
5. B. Qin and S. Li, *Phys Chem Chem Phys*, 2020, **22**, 3390-3399.
6. Z. Zhou, B. Qin, S. Li and Y. Sun, *Phys Chem Chem Phys*, 2021, **23**, 1888-1895.
7. S. Dang, B. Qin, Y. Yang, H. Wang, J. Cai, Y. Han, S. Li, P. Gao and Y. Sun, *Sci Adv*, 2020, **6**, eaaz2060.
8. G. Henkelman, B. P. Uberuaga and H. Jónsson, *J Chem Phys*, 2000, **113**, 9901-9904.
9. S. Smidstrup, A. Pedersen, K. Stokbro and H. Jónsson, *J Chem Phys*, 2014, **140**, 214106-214106.
10. A. H. MacDonald, *Phys Rev B*, 1978, **18**, 5897-5899.

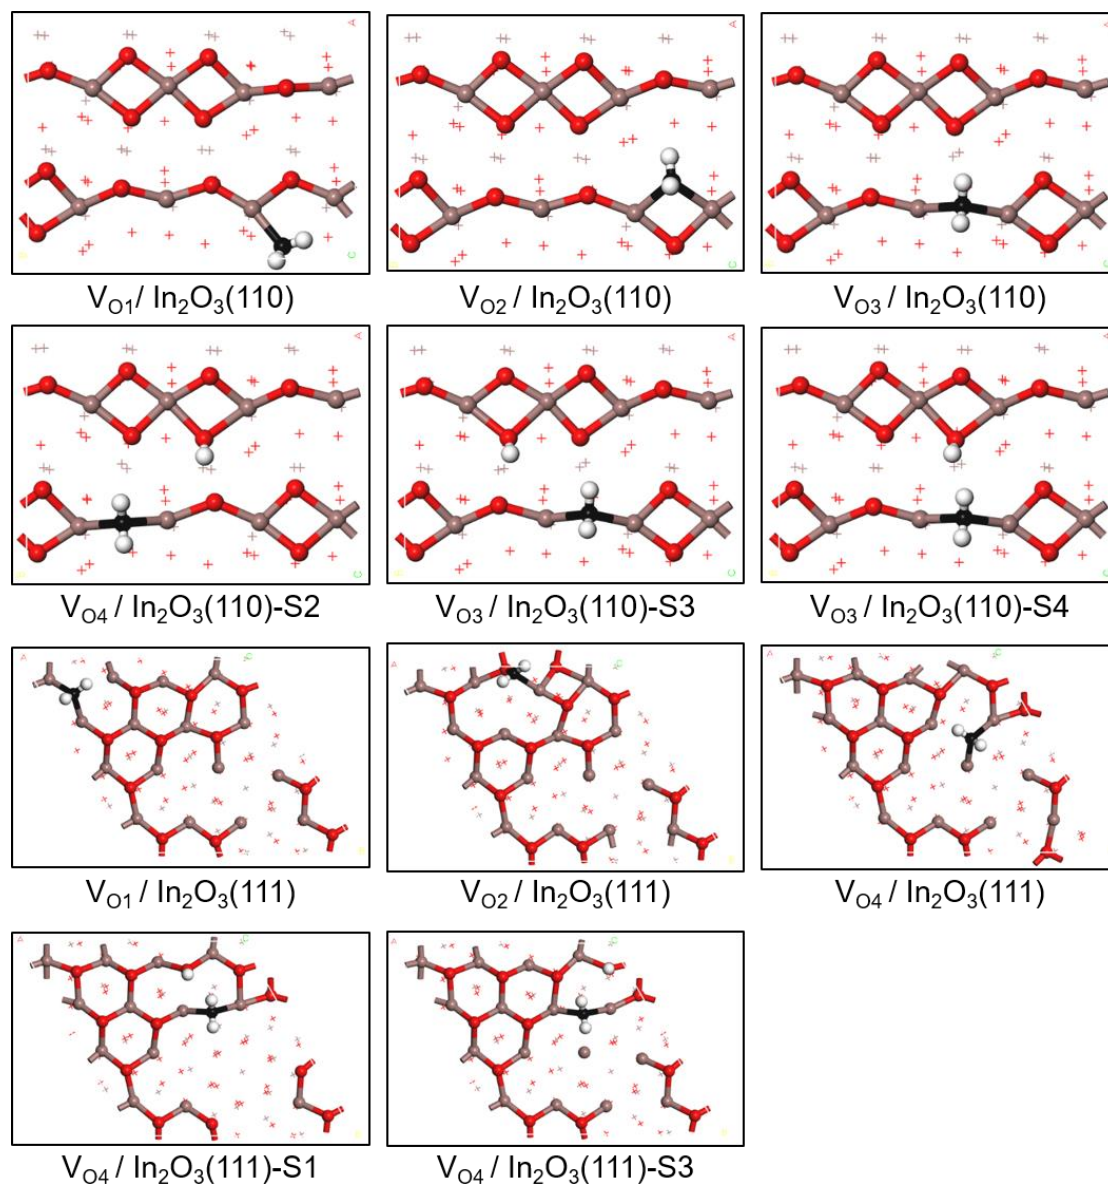

**Fig. S1** CH<sub>2</sub> adsorption structures at different oxygen vacancies (red: O, black: C, white: H, grey: In).

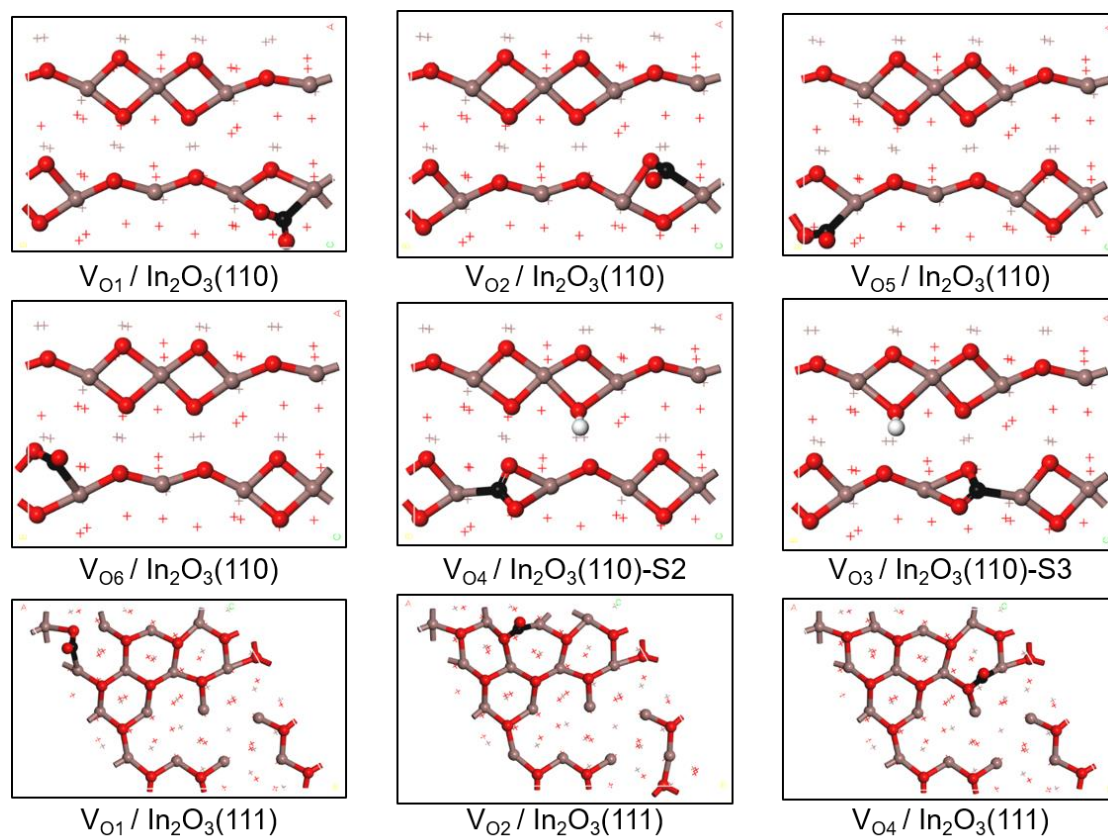

**Fig. S2** CO<sub>2</sub> adsorption structures at different oxygen vacancies (red: O, black: C, white: H, grey: In).

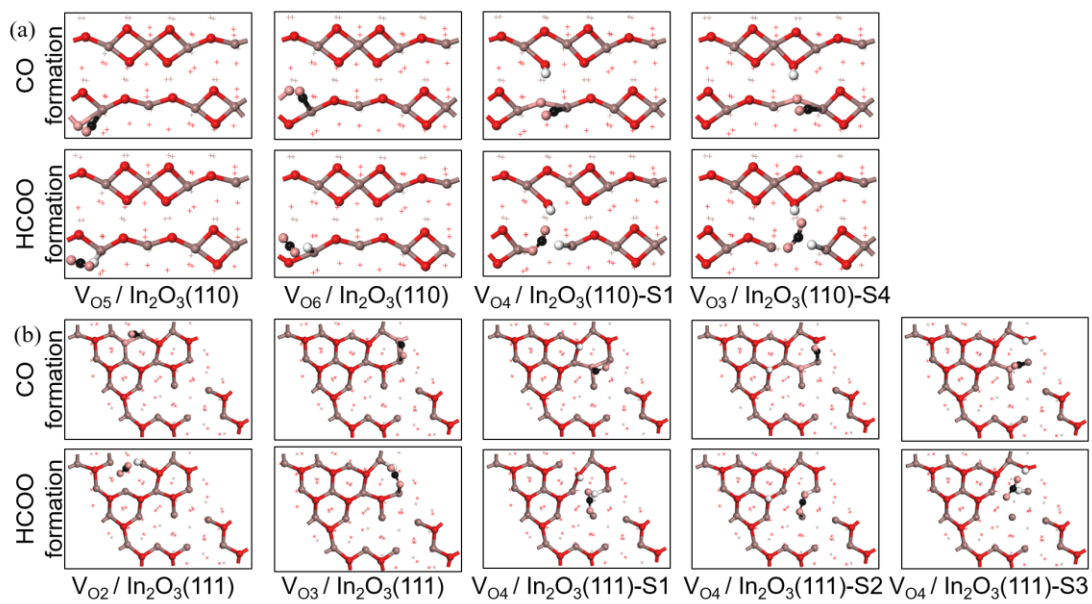

**Fig. S3** Transition state structures at different oxygen vacancies (red: O ,black: C, white: H, grey: In ).

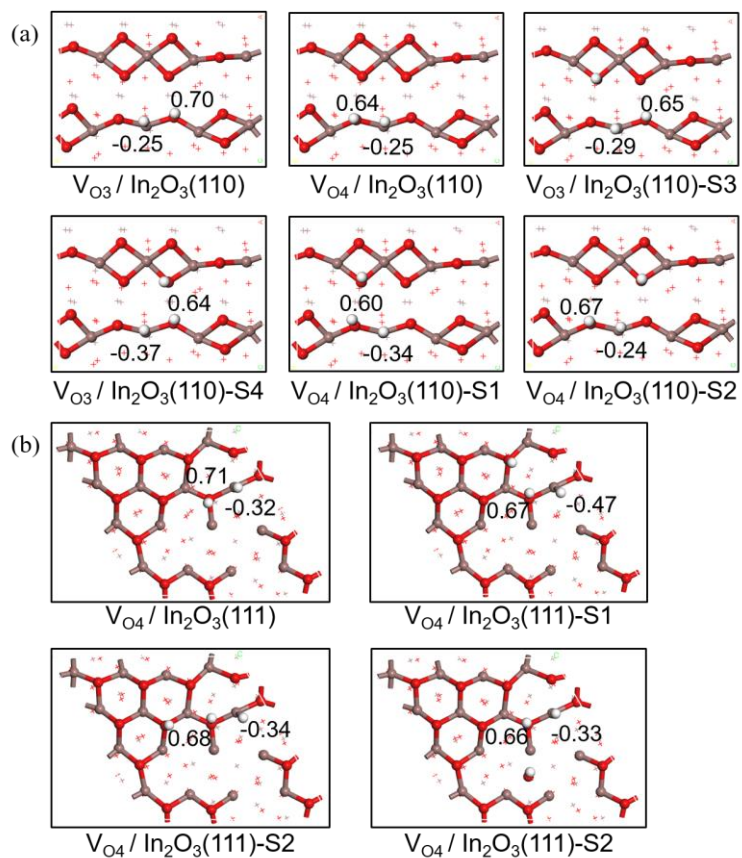

**Fig. S4** (a) (b) The structure of  $\text{H}_2$  dissociated at different sites. ( red: O, black: C, white: H, grey: In)

The charge of H atom after  $\text{H}_2$  dissociation has been marked in the figure, H atom in OH has a positive charge, between 0.6 e and 0.7 e, so these H atoms are considered as  $\text{H}^+$ . H atom in In-H has a negative charge, between -0.2 e and -0.4 e, so these H atoms are considered as  $\text{H}^-$ .

**Table S1:** Oxygen vacancy formation energy, CH<sub>2</sub> adsorption energy in eV and their absolute/relative errors in eV and %

|                                                 | $\Delta E_{f,VO}$ | $\Delta E_{f,VO}$ | Error        | $E_{ads,CH_2}$ | $E_{ads,CH_2}$ | Error        |
|-------------------------------------------------|-------------------|-------------------|--------------|----------------|----------------|--------------|
|                                                 | All relaxed       | Bottom fixed      |              | All relaxed    | Bottom fixed   |              |
| <b><i>In<sub>2</sub>O<sub>3</sub> (110)</i></b> |                   |                   |              |                |                |              |
| (110) VO <sub>1</sub>                           | 2.68              | 2.80              | 0.12 (4.48%) | -3.87          | -3.94          | 0.07 (1.81%) |
| (110) VO <sub>2</sub>                           | 2.94              | 2.80              | 0.14 (4.76%) | -3.81          | -3.63          | 0.18 (4.72%) |
| (110) VO <sub>3</sub>                           | 3.01              | 3.02              | 0.01 (0.33%) | -5.45          | -5.39          | 0.06 (1.10%) |
| (110) VO <sub>4</sub>                           | 2.97              | 3.05              | 0.08 (2.69%) | -5.28          | -5.29          | 0.01 (0.19%) |
| (110) VO <sub>5</sub>                           | 2.69              | 2.75              | 0.06 (2.23%) | -3.43          | -3.60          | 0.17 (4.96%) |
| (110) VO <sub>6</sub>                           | 2.72              | 2.75              | 0.03 (1.10%) | -3.41          | -3.45          | 0.04 (1.17%) |
| SELPs1                                          | 3.32              | 3.43              | 0.11 (3.31%) | -5.30          | -5.29          | 0.01 (0.19%) |
| SELPs2                                          | 3.10              | 3.18              | 0.08 (2.58%) | -5.29          | -5.26          | 0.03 (0.57%) |
| SELPs3                                          | 3.13              | 3.13              | 0.00 (0.00%) | -5.46          | -5.41          | 0.05 (0.92%) |
| SELPs4                                          | 3.41              | 3.48              | 0.07 (2.05%) | -5.42          | -5.38          | 0.04 (0.74%) |
| <b><i>In<sub>2</sub>O<sub>3</sub> (111)</i></b> |                   |                   |              |                |                |              |
| (111) OV <sub>1</sub>                           | 2.92              | 2.82              | 0.10 (3.42%) | -3.94          | -3.82          | 0.12 (3.05%) |
| (111) OV <sub>2</sub>                           | 2.77              | 2.65              | 0.12 (4.33%) | -3.49          | -3.47          | 0.02 (0.57%) |
| (111) OV <sub>3</sub>                           | 3.56              | 3.50              | 0.06 (1.69%) | -4.33          | -4.24          | 0.09 (2.08%) |
| (111) OV <sub>4</sub>                           | 3.22              | 3.23              | 0.01 (0.31%) | -4.26          | -4.23          | 0.03 (0.70%) |
| SELPs1                                          | 3.74              | 3.70              | 0.04 (1.07%) | -4.50          | -4.43          | 0.07 (1.56%) |
| SELPs2                                          | 3.62              | 3.58              | 0.04 (1.10%) | -4.05          | -3.99          | 0.06 (1.48%) |
| SELPs3                                          | 3.37              | 3.35              | 0.02 (0.59%) | -4.24          | -4.36          | 0.12 (2.83%) |
| <b>Max Error</b>                                |                   |                   | 0.14 (4.76%) |                |                | 0.17 (4.96%) |



In Table S1,  $\Delta E_{f,VO}$  and  $E_{ads,CH_2}$  represent the oxygen vacancy formation energy and  $CH_2$  adsorption energy in the article,  $\Delta E_{f,VO-1}$  and  $E_{ads,CH_2-1}$  represent the oxygen vacancy formation energy and  $CH_2$  adsorption energy after fixing atoms in the bottom of the slab. Their comparison shows that the absolute (relative) error in the calculated  $\Delta E_{f,VO}$  ranges from 0.00 eV to 0.14 eV (<4.8%), and that in  $E_{ads,CH_2}$  ranges from 0.01 eV to 0.17 eV (<5.0%). In addition, for the oxygen vacancy formation energy, the absolute (relative) error for the  $V_{O3}$  and  $V_{O4}$  sites on  $In_2O_3(110)$  and the  $V_{O4}$  site on  $In_2O_3(111)$  is less than 0.08 eV (<2.7%), whereas for the  $CH_2$  adsorption energy, the absolute (relative) error for the  $V_{O3}$  and  $V_{O4}$  sites on  $In_2O_3(110)$  and the  $V_{O4}$  site on  $In_2O_3(111)$  is less than 0.06 eV (<1.1%). Therefore, the effect of fixing atoms in the bottom layer of the slab on the reaction energies can be expected to be rather small.

**Table S2** Oxygen vacancy formation energies and changes in the Bader charges of the In atoms.

| Oxygen vacancy                                  | $\Delta E_{f,VO}/eV$ | In Charge                  | In Charge                  | In Charge                  | Sum of changes |
|-------------------------------------------------|----------------------|----------------------------|----------------------------|----------------------------|----------------|
| <b><i>In<sub>2</sub>O<sub>3</sub> (110)</i></b> |                      |                            |                            |                            |                |
| (110) Vo <sub>1</sub>                           | 2.68                 | In1: -0.13 (1.74 e→1.61 e) | In2: -0.51 (1.70 e→1.19 e) | /                          | -0.64          |
| (110) Vo <sub>2</sub>                           | 2.94                 | In1: -0.13 (1.74 e→1.61 e) | In2: -0.54 (1.70 e→1.16 e) | /                          | -0.67          |
| (110) Vo <sub>3</sub>                           | 3.01                 | In2: -0.56 (1.70 e→1.14 e) | In3: -0.46 (1.71 e→1.25 e) | /                          | -1.02          |
| (110) Vo <sub>4</sub>                           | 2.97                 | In3: -0.24 (1.71 e→1.47 e) | In4: -0.72 (1.75 e→1.03 e) | /                          | -0.96          |
| (110) Vo <sub>5</sub>                           | 2.69                 | In4: -0.14 (1.75 e→1.61 e) | In1: -0.15 (1.74 e→1.59 e) | /                          | -0.29          |
| (110) Vo <sub>6</sub>                           | 2.72                 | In3: -0.13 (1.75 e→1.62 e) | In4: -0.13 (1.74 e→1.61 e) | /                          | -0.26          |
| SELPs1                                          | 3.32                 | In3: -0.74 (1.65 e→0.91 e) | In4: -0.28 (1.73 e→1.45 e) | /                          | -1.02          |
| SELPs2                                          | 3.10                 | In3: -0.76 (1.65 e→0.89 e) | In4: -0.26 (1.74 e→1.48 e) | /                          | -1.02          |
| SELPs3                                          | 3.13                 | In2: -0.44 (1.65 e→1.21 e) | In3: -0.68 (1.73 e→1.05 e) | /                          | -1.12          |
| SELPs4                                          | 3.41                 | In2: -0.48 (1.65 e→1.17 e) | In3: -0.72 (1.74 e→1.02 e) | /                          | -1.20          |
| <b><i>In<sub>2</sub>O<sub>3</sub> (111)</i></b> |                      |                            |                            |                            |                |
| (111) Vo <sub>1</sub>                           | 2.92                 | In1: -0.18 (1.76 e→1.58 e) | In2: -0.11 (1.79 e→1.68 e) | In5: -0.11 (1.75 e→1.64 e) | -0.40          |
| (111) Vo <sub>2</sub>                           | 2.77                 | In2: -0.08 (1.79 e→1.71 e) | In3: -0.17 (1.75 e→1.58 e) | In6: -0.11 (1.80 e→1.69 e) | -0.36          |
| (111) Vo <sub>3</sub>                           | 3.56                 | In4: 0.02 (1.76 e→1.78 e)  | In8: -0.27 (1.80 e→1.53 e) | In1: -0.21 (1.76 e→1.55 e) | -0.46          |
| (111) Vo <sub>4</sub>                           | 3.22                 | In7: -0.20 (1.80 e→1.60 e) | In8: -0.43 (1.80 e→1.37 e) | In9: -0.23 (1.74 e→1.51 e) | -0.86          |
| SELPs1                                          | 3.74                 | In7: -0.25 (1.78 e→1.53 e) | In8: -0.49 (1.75 e→1.26 e) | In9: -0.23 (1.73 e→1.50 e) | -0.97          |
| SELPs2                                          | 3.62                 | In7: -0.27 (1.79 e→1.52 e) | In8: -0.44 (1.75 e→1.31 e) | In9: -0.27 (1.74 e→1.47 e) | -0.98          |
| SELPs3                                          | 3.37                 | In7: -0.14 (1.79 e→1.65 e) | In8: -0.69 (1.71 e→1.02 e) | In9: -0.17 (1.74 e→1.57 e) | -1.00          |

**Table S3** Adsorption energies of CH<sub>2</sub> and changes in the Bader charges of the In atoms.

| Oxygen vacancy                           | E <sub>ads,CH<sub>2</sub></sub> /eV | In Charge                  | In Charge                  | In Charge                  | Sum of changes |
|------------------------------------------|-------------------------------------|----------------------------|----------------------------|----------------------------|----------------|
| <b>In<sub>2</sub>O<sub>3</sub> (110)</b> |                                     |                            |                            |                            |                |
| (110) Vo <sub>1</sub>                    | -3.87                               | In1: 0.05 (1.61 e→1.66 e)  | In2: 0.29 (1.19 e→1.48 e)  | /                          | 0.34           |
| (110) Vo <sub>2</sub>                    | -3.81                               | In1: -0.01 (1.61 e→1.60 e) | In2: 0.32 (1.16 e→1.48 e)  | /                          | 0.31           |
| (110) Vo <sub>3</sub>                    | -5.45                               | In2: 0.35 (1.14 e→1.49 e)  | In3: 0.24 (1.25 e→1.49 e)  | /                          | 0.59           |
| (110) Vo <sub>4</sub>                    | -5.28                               | In3: 0.02 (1.47 e→1.49 e)  | In4: 0.76 (1.03 e→1.79 e)  | /                          | 0.78           |
| (110) Vo <sub>5</sub>                    | -3.43                               | In4: -0.05 (1.61 e→1.56 e) | In1: 0.08 (1.59 e→1.67 e)  | /                          | 0.03           |
| (110) Vo <sub>6</sub>                    | -3.41                               | In4: -0.03 (1.62 e→1.59 e) | In1: 0.09 (1.61 e→1.70 e)  | /                          | 0.06           |
| SELPs1                                   | -5.30                               | In3: 0.54 (0.91 e→1.47 e)  | In4: 0.30 (1.45 e→1.57 e)  | /                          | 0.84           |
| SELPs2                                   | -5.29                               | In3: 0.52 (0.89 e→1.45 e)  | In4: 0.29 (1.48 e→1.56 e)  | /                          | 0.81           |
| SELPs3                                   | -5.46                               | In2: 0.28 (1.21 e→1.50 e)  | In3: 0.63 (1.05 e→1.49 e)  | /                          | 0.91           |
| SELPs4                                   | -5.42                               | In2: 0.33 (1.17 e→1.49 e)  | In3: 0.67 (1.02 e→1.51 e)  | /                          | 1.00           |
| <b>In<sub>2</sub>O<sub>3</sub> (111)</b> |                                     |                            |                            |                            |                |
| (111) Vo <sub>1</sub>                    | -3.94                               | In1: -0.03(1.58 e→1.55 e)  | In2: 0.06 (1.68 e→1.74 e)  | In5: -0.07 (1.64 e→1.57 e) | -0.04          |
| (111) Vo <sub>2</sub>                    | -3.49                               | In2: 0.02(1.71 e→1.73 e)   | In3: -0.12 (1.58 e→1.46 e) | In6: 0.02 (1.69 e→1.71 e)  | -0.10          |
| (111) Vo <sub>3</sub>                    | -4.33                               | In4: -0.19(1.78 e→1.59 e)  | In8: 0.18 (1.53 e→1.71 e)  | In1: 0.04 (1.55 e→1.59 e)  | 0.03           |
| (111) Vo <sub>4</sub>                    | -4.26                               | In7: 0.14(1.60 e→1.74 e)   | In8: 0.16 (1.37 e→1.53 e)  | In9: 0.05 (1.51 e→1.56 e)  | 0.35           |
| SELPs1                                   | -4.50                               | In7: 0.03 (1.53 e→1.56 e)  | In8: 0.30 (1.26 e→1.56 e)  | In9: 0.18 (1.50 e→1.68 e)  | 0.51           |
| SELPs2                                   | -4.05                               | In7: 0.09 (1.52 e→1.61 e)  | In8: 0.35 (1.31 e→1.66 e)  | In9: 0.07 (1.47 e→1.54 e)  | 0.51           |
| SELPs3                                   | -4.24                               | In7: 0.14 (1.65 e→1.79 e)  | In8: 0.47 (1.02 e→1.49 e)  | In9: 0.13 (1.57 e→1.70 e)  | 0.74           |

**Table S4** Adsorption energies of CO<sub>2</sub> and changes in the Bader charges of the In atoms.

| Oxygen vacancy                           | E <sub>ads,CO2</sub> /eV | In Charge                  | In Charge                  | In Charge                 | Sum of changes |
|------------------------------------------|--------------------------|----------------------------|----------------------------|---------------------------|----------------|
| <b>In<sub>2</sub>O<sub>3</sub> (110)</b> |                          |                            |                            |                           |                |
| (110) VO <sub>1</sub>                    | 0.82                     | In1: 0.03 (1.61 e→1.64 e)  | In2: 0.51 (1.19 e→1.70 e)  | /                         | 0.54           |
| (110) VO <sub>2</sub>                    | 0.69                     | In1: -0.03 (1.61 e→1.58 e) | In2: 0.57 (1.16 e→1.73 e)  | /                         | 0.54           |
| (110) VO <sub>3</sub>                    | -0.44                    | In2: 0.16 (1.14 e→1.30 e)  | In3: 0.23 (1.25 e→1.48 e)  | /                         | 0.39           |
| (110) VO <sub>4</sub>                    | -0.42                    | In3: 0.29 (1.47 e→1.76 e)  | In4: 0.43 (1.03 e→1.46 e)  | /                         | 0.72           |
| (110) VO <sub>5</sub>                    | 0.47                     | In4: -0.06 (1.61 e→1.55 e) | In1: 0.15 (1.59 e→1.74 e)  | /                         | 0.09           |
| (110) VO <sub>6</sub>                    | 0.65                     | In4: -0.04 (1.62 e→1.58 e) | In1: 0.13 (1.61 e→1.74 e)  | /                         | 0.09           |
| SELPs1                                   | -0.56                    | In3: 0.54 (0.91 e→1.45 e)  | In4: 0.30 (1.45 e→1.75 e)  | /                         | 0.84           |
| SELPs2                                   | -0.41                    | In3: 0.52 (0.89 e→1.41 e)  | In4: 0.29 (1.48 e→1.77 e)  | /                         | 0.81           |
| SELPs3                                   | -0.42                    | In2: 0.28 (1.21 e→1.49 e)  | In3: 0.63 (1.05 e→1.68 e)  | /                         | 0.91           |
| SELPs4                                   | -0.62                    | In2: 0.33 (1.17 e→1.50 e)  | In3: 0.67 (1.02 e→1.69 e)  | /                         | 1.00           |
| <b>In<sub>2</sub>O<sub>3</sub> (111)</b> |                          |                            |                            |                           |                |
| (111) VO <sub>1</sub>                    | 0.59                     | In1: 0.19 (1.58 e→1.77 e)  | In2: 0.10 (1.68 e→1.78 e)  | In5: -0.07 (1.64 e→1.57e) | 0.22           |
| (111) VO <sub>2</sub>                    | 0.29                     | In2: 0.10 (1.71 e→1.81 e)  | In3: -0.05 (1.58 e→1.53 e) | In6: 0.12 (1.69 e→1.81 e) | 0.17           |
| (111) VO <sub>3</sub>                    | -0.03                    | In4: -0.01 (1.78 e→1.77 e) | In8: 0.23 (1.53 e→1.76 e)  | In1: 0.02 (1.55 e→1.57 e) | 0.24           |
| (111) VO <sub>4</sub>                    | 0.36                     | In7: 0.18 (1.60 e→1.78 e)  | In8: 0.13 (1.37 e→1.50 e)  | In9: 0.27 (1.51 e→1.78 e) | 0.58           |

**Table S5** Relative energies for CO<sub>2</sub> hydrogenation to form the HCOO species (unit: eV).

| Oxygen vacancy                                  | In-CO <sub>2</sub> *+H* | TS(HCOO) | HCOO* | E <sub>a</sub> (HCOO) | Frequency of TS/cm <sup>-1</sup> |
|-------------------------------------------------|-------------------------|----------|-------|-----------------------|----------------------------------|
| <b><i>In<sub>2</sub>O<sub>3</sub> (110)</i></b> |                         |          |       |                       |                                  |
| V <sub>O1</sub>                                 | 1.38                    | 1.42     | -0.03 | 0.04                  | 270.06                           |
| V <sub>O2</sub>                                 | 0.85                    | 0.96     | -0.61 | 0.11                  | 231.56                           |
| V <sub>O3</sub>                                 | 0.68                    | 1.00     | -0.44 | 0.32                  | 291.56                           |
| V <sub>O4</sub>                                 | 0.63                    | 0.78     | -0.41 | 0.15                  | 340.83                           |
| V <sub>O5</sub>                                 | 0.54                    | 1.44     | -0.33 | 0.90                  | 390.94                           |
| V <sub>O6</sub>                                 | 1.36                    | 1.50     | -0.33 | 0.14                  | 321.95                           |
| SFLPs1                                          | 0.90                    | 1.20     | -0.10 | 0.30                  | 463.12                           |
| SFLPs2                                          | 0.93                    | 1.21     | -0.07 | 0.28                  | 323.42                           |
| SFLPs3                                          | 0.79                    | 1.26     | -0.18 | 0.47                  | 402.86                           |
| SFLPs4                                          | 0.67                    | 1.39     | -0.18 | 0.72                  | 246.76                           |
| <b><i>In<sub>2</sub>O<sub>3</sub> (111)</i></b> |                         |          |       |                       |                                  |
| V <sub>O1</sub>                                 | 1.08                    | 1.37     | 0.27  | 0.29                  | 453.58                           |
| V <sub>O2</sub>                                 | 0.94                    | 1.13     | -0.48 | 0.19                  | 383.66                           |
| V <sub>O3</sub>                                 | 0.82                    | 1.25     | -0.35 | 0.43                  | 516.19                           |
| V <sub>O4</sub>                                 | 1.00                    | 1.43     | -0.04 | 0.43                  | 524.32                           |
| SFLPs1                                          | 1.06                    | 1.42     | 0.08  | 0.36                  | 553.87                           |
| SFLPs2                                          | 1.11                    | 1.57     | 0.05  | 0.46                  | 585.77                           |
| SFLPs3                                          | 1.18                    | 1.61     | 0.13  | 0.42                  | 554.51                           |

**Table S6** Relative energies for CO<sub>2</sub> direct dissociation to CO (unit: eV).

| Oxygen vacancy                                  | bt-CO <sub>2</sub> * | TS(CO) | CO*   | O*    | E <sub>a</sub> (CO) | Frequency of TS/cm <sup>-1</sup> |
|-------------------------------------------------|----------------------|--------|-------|-------|---------------------|----------------------------------|
| <b><i>In<sub>2</sub>O<sub>3</sub> (110)</i></b> |                      |        |       |       |                     |                                  |
| V <sub>O1</sub>                                 | 0.82                 | 1.23   | 0.99  | 0.84  | 0.41                | 182.75                           |
| V <sub>O2</sub>                                 | 0.69                 | 1.14   | 0.72  | 0.58  | 0.45                | 218.60                           |
| V <sub>O3</sub>                                 | -0.44                | 0.68   | 0.57  | 0.34  | 1.12                | 190.82                           |
| V <sub>O4</sub>                                 | -0.42                | 0.61   | 0.57  | 0.29  | 1.02                | 230.19                           |
| V <sub>O5</sub>                                 | 0.65                 | 1.19   | 0.92  | 0.75  | 0.54                | 189.87                           |
| V <sub>O6</sub>                                 | 0.47                 | 1.22   | 0.97  | 0.83  | 0.75                | 201.93                           |
| SFLPs1                                          | -0.56                | 0.44   | 0.32  | 0.14  | 1.00                | 240.81                           |
| SFLPs2                                          | -0.41                | 0.56   | 0.51  | 0.31  | 0.97                | 193.84                           |
| SFLPs3                                          | -0.53                | 0.50   | 0.49  | 0.29  | 1.03                | 270.62                           |
| SFLPs4                                          | -0.62                | 0.38   | 0.22  | 0.04  | 1.00                | 235.51                           |
| <b><i>In<sub>2</sub>O<sub>3</sub> (111)</i></b> |                      |        |       |       |                     |                                  |
| V <sub>O1</sub>                                 | 0.59                 | 1.37   | 0.86  | 0.84  | 0.78                | 295.97                           |
| V <sub>O2</sub>                                 | 0.29                 | 1.07   | 0.95  | 0.86  | 0.78                | 215.08                           |
| V <sub>O3</sub>                                 | -0.03                | 0.68   | 0.12  | -0.01 | 0.71                | 262.37                           |
| V <sub>O4</sub>                                 | 0.36                 | 0.86   | 0.56  | 0.53  | 0.50                | 267.69                           |
| SFLPs1                                          | /                    | 0.64   | -0.04 | -0.15 | 0.64                | 180.56                           |
| SFLPs2                                          | /                    | 0.36   | 0.14  | 0.09  | 0.36                | 190.39                           |
| SFLPs3                                          | /                    | 0.68   | 0.38  | 0.32  | 0.68                | 249.46                           |

**Table S7** Energy barriers of H<sub>2</sub> dissociation (unit: eV).

| Oxygen vacancy                                  | E <sub>a,H2</sub> |
|-------------------------------------------------|-------------------|
| <b><i>In<sub>2</sub>O<sub>3</sub> (110)</i></b> |                   |
| V <sub>O1</sub>                                 | 0.54              |
| V <sub>O2</sub>                                 | 0.34              |
| V <sub>O3</sub>                                 | 0.45              |
| V <sub>O4</sub>                                 | 0.62              |
| V <sub>O5</sub>                                 | 0.37              |
| V <sub>O6</sub>                                 | 0.62              |
| SFLPs1                                          | 0.48              |
| SFLPs2                                          | 0.35              |
| SFLPs3                                          | 0.60              |
| SFLPs4                                          | 0.60              |
| <b><i>In<sub>2</sub>O<sub>3</sub> (111)</i></b> |                   |
| V <sub>O1</sub>                                 | 0.63              |
| V <sub>O2</sub>                                 | 0.70              |
| V <sub>O3</sub>                                 | 0.53              |
| V <sub>O4</sub>                                 | 0.82              |
| SFLPs1                                          | 0.77              |
| SFLPs2                                          | 0.56              |
| SFLPs3                                          | 0.65              |

**Table S8** Optimized fractional coordinates of the In<sub>2</sub>O<sub>3</sub>(110) surface.

O In

|                     |                     |                     |
|---------------------|---------------------|---------------------|
| 1.0000000000000000  |                     |                     |
| 10.2136999999999993 | 0.0000000000000000  | 0.0000000000000000  |
| 0.00000000000000009 | 14.4443000000000001 | 0.0000000000000000  |
| 0.00000000000000010 | 0.00000000000000010 | 15.9873999999999992 |

O In  
48 32

Direct

|                    |                    |                    |   |   |   |
|--------------------|--------------------|--------------------|---|---|---|
| 0.6083428230800030 | 0.1821215359988391 | 0.4369380184058317 | T | T | T |
| 0.1083428230800027 | 0.6821215359988391 | 0.4369380184058317 | T | T | T |
| 0.1094363580034473 | 0.9648884489568584 | 0.4555553453986410 | T | T | T |
| 0.6094363580034472 | 0.4648884489568584 | 0.4555553453986410 | T | T | T |
| 0.3254848780506642 | 0.5826213985373794 | 0.3473318207177140 | T | T | T |
| 0.8254848780506642 | 0.0826213985373793 | 0.3473318207177140 | T | T | T |
| 0.8260020925417190 | 0.5646746294712682 | 0.5352225378989747 | T | T | T |
| 0.3260020925417190 | 0.0646746294712684 | 0.5352225378989747 | T | T | T |
| 0.1003999706780155 | 0.9668908476826428 | 0.6656460498037335 | T | T | T |
| 0.6003999706780154 | 0.4668908476826428 | 0.6656460498037335 | T | T | T |
| 0.3268381527760965 | 0.8182488361835055 | 0.3459993695232036 | T | T | T |
| 0.8268381527760965 | 0.3182488361835055 | 0.3459993695232036 | T | T | T |
| 0.6043109270843865 | 0.6849245476091186 | 0.6826411166279759 | T | T | T |
| 0.1043109270843867 | 0.1849245476091188 | 0.6826411166279759 | T | T | T |
| 0.8351846750035605 | 0.3289409540641913 | 0.5384322950722678 | T | T | T |
| 0.3351846750035606 | 0.8289409540641913 | 0.5384322950722678 | T | T | T |
| 0.5603190575872750 | 0.6966087736704329 | 0.4613955375896568 | T | T | T |
| 0.0603190575872748 | 0.1966087736704329 | 0.4613955375896568 | T | T | T |
| 0.3878793855271461 | 0.0665096639563859 | 0.3210391325717529 | T | T | T |
| 0.8878793855271462 | 0.5665096639563859 | 0.3210391325717529 | T | T | T |
| 0.8758499618203253 | 0.0847275218231312 | 0.5582585050059113 | T | T | T |



|                    |                    |                    |   |   |   |
|--------------------|--------------------|--------------------|---|---|---|
| 0.3758499618203254 | 0.5847275218231311 | 0.5582585050059113 | T | T | T |
| 0.0600052737669815 | 0.4586098865427559 | 0.4423391707361337 | T | T | T |
| 0.5600052737669815 | 0.9586098865427558 | 0.4423391707361337 | T | T | T |
| 0.7981607347463098 | 0.2150341764968214 | 0.6877865182044192 | T | T | T |
| 0.2981607347463097 | 0.7150341764968214 | 0.6877865182044192 | T | T | T |
| 0.3116026387886767 | 0.4368160890317112 | 0.6796880569330696 | T | T | T |
| 0.8116026387886767 | 0.9368160890317183 | 0.6796880569330696 | T | T | T |
| 0.0939569927825695 | 0.3204464216590973 | 0.3151540740771181 | T | T | T |
| 0.5939569927825694 | 0.8204464216590971 | 0.3151540740771181 | T | T | T |
| 0.6069820511261995 | 0.8391767716059221 | 0.5754984734305879 | T | T | T |
| 0.1069820511261997 | 0.3391767716059221 | 0.5754984734305879 | T | T | T |
| 0.3325098125593699 | 0.4267397947097418 | 0.4595683451534162 | T | T | T |
| 0.8325098125593700 | 0.9267397947097420 | 0.4595683451534162 | T | T | T |
| 0.0906216482510172 | 0.0851911342083012 | 0.3123923755926927 | T | T | T |
| 0.5906216482510172 | 0.5851911342083013 | 0.3123923755926927 | T | T | T |
| 0.8287523751236080 | 0.7205200792257886 | 0.4368591155133884 | T | T | T |
| 0.3287523751236079 | 0.2205200792257886 | 0.4368591155133884 | T | T | T |
| 0.5969658153747263 | 0.0702687422077286 | 0.5838934580180218 | T | T | T |
| 0.0969658153747263 | 0.5702687422077287 | 0.5838934580180218 | T | T | T |
| 0.8733359482790036 | 0.6974254988451853 | 0.6686327238701679 | T | T | T |
| 0.3733359482790036 | 0.1974254988451854 | 0.6686327238701679 | T | T | T |
| 0.0300060410821778 | 0.8339050571699889 | 0.3248364395012205 | T | T | T |
| 0.5300060410821777 | 0.3339050571699890 | 0.3248364395012205 | T | T | T |
| 0.5577861020572096 | 0.3122064445353567 | 0.5629169872554650 | T | T | T |
| 0.0577861020572095 | 0.8122064445353567 | 0.5629169872554650 | T | T | T |
| 0.3681068522871402 | 0.9523514997506451 | 0.6848400816119061 | T | T | T |
| 0.8681068522871401 | 0.4523514997506453 | 0.6848400816119061 | T | T | T |
| 0.9672588604138499 | 0.2175917950161028 | 0.5835113993648092 | T | T | T |
| 0.4578642501252143 | 0.9300149222408519 | 0.3307345982705630 | T | T | T |
| 0.9578642501252141 | 0.4300149222408519 | 0.3307345982705630 | T | T | T |

|                    |                    |                    |   |   |   |
|--------------------|--------------------|--------------------|---|---|---|
| 0.4672588604138498 | 0.7175917950161028 | 0.5835113993648092 | T | T | T |
| 0.2197158900674743 | 0.5582751364735336 | 0.4603161767097189 | T | T | T |
| 0.2136161334356610 | 0.0915235569049950 | 0.4218755434027682 | T | T | T |
| 0.7136161334356611 | 0.5915235569049951 | 0.4218755434027682 | T | T | T |
| 0.7197158900674743 | 0.0582751364735337 | 0.4603161767097189 | T | T | T |
| 0.7442861692658064 | 0.5736695727439871 | 0.6646181053776383 | T | T | T |
| 0.1810881729654220 | 0.8248200329316175 | 0.4406828766877843 | T | T | T |
| 0.6810881729654290 | 0.3248200329316176 | 0.4406828766877843 | T | T | T |
| 0.2442861692658065 | 0.0736695727439869 | 0.6646181053776383 | T | T | T |
| 0.4637166537784854 | 0.1824930474386829 | 0.5476518254178890 | T | T | T |
| 0.9666118805511511 | 0.9710102516312472 | 0.3526602059708915 | T | T | T |
| 0.4666118805511510 | 0.4710102516312472 | 0.3526602059708915 | T | T | T |
| 0.9637166537784855 | 0.6824930474386831 | 0.5476518254178890 | T | T | T |
| 0.2199060471478881 | 0.8461676448981347 | 0.6541776092766940 | T | T | T |
| 0.2326413378491865 | 0.3025360939495086 | 0.6742496541390306 | T | T | T |
| 0.7326413378491865 | 0.8025360939495090 | 0.6742496541390306 | T | T | T |
| 0.7199060471478880 | 0.3461676448981346 | 0.6541776092766940 | T | T | T |
| 0.6775384794461232 | 0.8257264735290554 | 0.4430394862328090 | T | T | T |
| 0.2531722875519335 | 0.5763511875231372 | 0.6678045626850462 | T | T | T |
| 0.7531722875519337 | 0.0763511875231372 | 0.6678045626850462 | T | T | T |
| 0.1775384794461231 | 0.3257264735290553 | 0.4430394862328090 | T | T | T |
| 0.9610153159705757 | 0.1997457020641322 | 0.3405082226888251 | T | T | T |
| 0.4647989539034962 | 0.9512713887214392 | 0.5655840289924665 | T | T | T |
| 0.9664998574227760 | 0.6993789979417215 | 0.3396506785460203 | T | T | T |
| 0.4659791417273259 | 0.4474354420490636 | 0.5667694777237950 | T | T | T |
| 0.9659791417273259 | 0.9474354420490634 | 0.5667694777237950 | T | T | T |
| 0.4610153159705755 | 0.6997457020641322 | 0.3405082226888251 | T | T | T |
| 0.9647989539034963 | 0.4512713887214390 | 0.5655840289924665 | T | T | T |
| 0.4664998574227758 | 0.1993789979417215 | 0.3396506785460203 | T | T | T |

**Table S9** Optimized fractional coordinates of the  $\text{In}_2\text{O}_3(110)$ -S1 surface.

O In H

|                     |                     |                     |
|---------------------|---------------------|---------------------|
| 1.0000000000000000  |                     |                     |
| 10.2136999999999993 | 0.0000000000000000  | 0.0000000000000000  |
| 0.0000000000000000  | 14.4443000000000001 | 0.0000000000000000  |
| 0.0000000000000000  | 0.0000000000000000  | 15.9873999999999992 |

|    |    |   |
|----|----|---|
| O  | In | H |
| 47 | 32 | 1 |

Selective dynamics

Direct

|                    |                    |                    |   |   |   |
|--------------------|--------------------|--------------------|---|---|---|
| 0.6095686820254770 | 0.1825114159645722 | 0.4381487546460453 | T | T | T |
| 0.1087755503256958 | 0.6837267130630117 | 0.4380760929483463 | T | T | T |
| 0.1104294540235488 | 0.9630634557161379 | 0.4562199416361755 | T | T | T |
| 0.6101560773873370 | 0.4669528846377826 | 0.4570635829020565 | T | T | T |
| 0.3266539379042760 | 0.5848428137919939 | 0.3513660417451590 | T | T | T |
| 0.8257243504928218 | 0.0813297348010074 | 0.3466417621759503 | T | T | T |
| 0.8288436381236814 | 0.5635665508648882 | 0.5339327126279299 | T | T | T |
| 0.3285786075623168 | 0.0621782484463505 | 0.5352262153034306 | T | T | T |
| 0.0993096973212565 | 0.9732814086921442 | 0.6641499747218254 | T | T | T |
| 0.6045400519654289 | 0.4705413993896739 | 0.6680745866612290 | T | T | T |
| 0.3318388234254163 | 0.8177085036304803 | 0.3489235124782502 | T | T | T |
| 0.8282280883024253 | 0.3174220783425004 | 0.3455766306097673 | T | T | T |
| 0.5843373546081168 | 0.6914487117635293 | 0.6911891883668372 | T | T | T |
| 0.1063778739625133 | 0.1863009871044712 | 0.6828143100028783 | T | T | T |
| 0.8372614679959249 | 0.3297141393924857 | 0.5371836788037235 | T | T | T |
| 0.3310291285695274 | 0.8231023682765823 | 0.5435581068209631 | T | T | T |
| 0.5675363313296302 | 0.6955409886803833 | 0.4551778260792210 | T | T | T |
| 0.0627322035562031 | 0.1946856467834246 | 0.4609770327509996 | T | T | T |
| 0.3894827107164080 | 0.0663701676419853 | 0.3230685179263911 | T | T | T |
| 0.8902642247123460 | 0.5650115738695870 | 0.3195316220643138 | T | T | T |

|                    |                    |                    |   |   |   |
|--------------------|--------------------|--------------------|---|---|---|
| 0.8741017712469671 | 0.0862542654574298 | 0.5578269791827184 | T | T | T |
| 0.3733470368224049 | 0.5896293842688191 | 0.5673777080091194 | T | T | T |
| 0.0636025601043780 | 0.4591420296240140 | 0.4405135683244523 | T | T | T |
| 0.5619842398437710 | 0.9547271995863184 | 0.4436499126616033 | T | T | T |
| 0.8025170943944021 | 0.2172656978427500 | 0.6883848192717004 | T | T | T |
| 0.3150162304177613 | 0.4331068385863817 | 0.6755101978372721 | T | T | T |
| 0.8139624003881055 | 0.9412269171459934 | 0.6827625451317587 | T | T | T |
| 0.0970576866089496 | 0.3185370078578923 | 0.3154008655653363 | T | T | T |
| 0.5963151283999035 | 0.8208150118032621 | 0.3118673486395753 | T | T | T |
| 0.6087734706105764 | 0.8330187214499214 | 0.5750309230839526 | T | T | T |
| 0.1099538420656946 | 0.3375184400508470 | 0.5735714823033832 | T | T | T |
| 0.3341759310236440 | 0.4291815027625749 | 0.4626179287615615 | T | T | T |
| 0.8343592807071639 | 0.9265028173522089 | 0.4593199853076924 | T | T | T |
| 0.0921685292815338 | 0.0839277281266352 | 0.3124955412833726 | T | T | T |
| 0.5907181721806120 | 0.5832975917714009 | 0.3092193616211075 | T | T | T |
| 0.8321389493782224 | 0.7187390398341894 | 0.4346047159141810 | T | T | T |
| 0.3312048039532282 | 0.2202072859270919 | 0.4384504220523315 | T | T | T |
| 0.5975079332706037 | 0.0682401186146862 | 0.5847906967827290 | T | T | T |
| 0.0991933899927908 | 0.5710901008850312 | 0.5843648098486605 | T | T | T |
| 0.8537304451054462 | 0.6957578031432488 | 0.6662524738335371 | T | T | T |
| 0.3769075864639577 | 0.1951434561849290 | 0.6685592851418450 | T | T | T |
| 0.0324801680597876 | 0.8336669843283414 | 0.3243587959243004 | T | T | T |
| 0.5303842841142344 | 0.3352711379718472 | 0.3275553062026847 | T | T | T |
| 0.5597583548098124 | 0.3138970693904501 | 0.5651757325996579 | T | T | T |
| 0.0525526297980516 | 0.8117906033901623 | 0.5696225399610874 | T | T | T |
| 0.3683927568421850 | 0.9486866534691396 | 0.6857058429398595 | T | T | T |
| 0.8748977351599391 | 0.4487759814773148 | 0.6839049709243311 | T | T | T |
| 0.9699343982332935 | 0.2180700852325546 | 0.5826746927001843 | T | T | T |
| 0.4602802974825161 | 0.9303608039543115 | 0.3300754501046473 | T | T | T |
| 0.9608806927618003 | 0.4280310840553849 | 0.3295013586690471 | T | T | T |

|                    |                    |                    |   |   |   |
|--------------------|--------------------|--------------------|---|---|---|
| 0.4718456293876815 | 0.7162054720961553 | 0.5690356587758626 | T | T | T |
| 0.2210727527121934 | 0.5596448587745998 | 0.4650531429070570 | T | T | T |
| 0.2160551900157550 | 0.0906985844125315 | 0.4216227433168199 | T | T | T |
| 0.7198073080926195 | 0.5880953923007968 | 0.4166321539304130 | T | T | T |
| 0.7199809717312891 | 0.0582348139135238 | 0.4599142640794607 | T | T | T |
| 0.7541110633758343 | 0.5671586516619401 | 0.6627886963139418 | T | T | T |
| 0.1804537847222987 | 0.8243617253286918 | 0.4386013573198021 | T | T | T |
| 0.6818465330502508 | 0.3264570205423368 | 0.4405745060960595 | T | T | T |
| 0.2467884059282460 | 0.0758251409452030 | 0.6640940895425119 | T | T | T |
| 0.4666550225871691 | 0.1826580228413016 | 0.5477674175447644 | T | T | T |
| 0.9679348668655058 | 0.9708179362778236 | 0.3510499683816460 | T | T | T |
| 0.4657702049540661 | 0.4719075641715568 | 0.3549600677781467 | T | T | T |
| 0.9641523173816748 | 0.6812137591698525 | 0.5465611317359045 | T | T | T |
| 0.2131453657898163 | 0.8514684073886558 | 0.6552989715168217 | T | T | T |
| 0.2357021072055678 | 0.3016381106153945 | 0.6739726222426455 | T | T | T |
| 0.7343307658093936 | 0.8107775764183430 | 0.6759401292688404 | T | T | T |
| 0.7226115299502337 | 0.3460486108162925 | 0.6531873315191220 | T | T | T |
| 0.6840746601102794 | 0.8250794857443519 | 0.4380698758820298 | T | T | T |
| 0.2458218580033192 | 0.5780554399171043 | 0.6831734373068362 | T | T | T |
| 0.7533399272694584 | 0.0803285020411364 | 0.6688923662045777 | T | T | T |
| 0.1809857707891052 | 0.3256408579870759 | 0.4426590498978161 | T | T | T |
| 0.9620792475202256 | 0.1987647227008275 | 0.3407450977467305 | T | T | T |
| 0.4664387628552888 | 0.9498217898713996 | 0.5661893235217931 | T | T | T |
| 0.9707396290424530 | 0.6979204138636090 | 0.3372015295390568 | T | T | T |
| 0.4627630389826733 | 0.4480659584594089 | 0.5717583805528610 | T | T | T |
| 0.9663271446948107 | 0.9506326473695527 | 0.5652624204389221 | T | T | T |
| 0.4638074840213340 | 0.6990290699852859 | 0.3356362451887697 | T | T | T |
| 0.9711635574503381 | 0.4500330209274394 | 0.5637353202265214 | T | T | T |
| 0.4678857751602116 | 0.2000547804561949 | 0.3397954827116389 | T | T | T |
| 0.5261372081412165 | 0.6763532813608948 | 0.7379284034407385 | T | T | T |

**Table S10** Optimized fractional coordinates of the In<sub>2</sub>O<sub>3</sub>(110)-S2 surface.

O In H

|                     |                     |                     |
|---------------------|---------------------|---------------------|
| 1.0000000000000000  |                     |                     |
| 10.2136999999999993 | 0.0000000000000000  | 0.0000000000000000  |
| 0.0000000000000000  | 14.4443000000000001 | 0.0000000000000000  |
| 0.0000000000000000  | 0.0000000000000000  | 15.9873999999999992 |

|    |    |   |
|----|----|---|
| O  | In | H |
| 47 | 32 | 1 |

Selective dynamics

Direct

|                    |                    |                    |   |   |   |
|--------------------|--------------------|--------------------|---|---|---|
| 0.6091085439923705 | 0.1843363085505927 | 0.4394681387796644 | T | T | T |
| 0.1081972113103023 | 0.6830949060102905 | 0.4375882644904662 | T | T | T |
| 0.1115686132259114 | 0.9639151433546352 | 0.4560162043075416 | T | T | T |
| 0.6066782372940802 | 0.4669826888258562 | 0.4587884538252157 | T | T | T |
| 0.3258457053777851 | 0.5847946907141761 | 0.3503920949489518 | T | T | T |
| 0.8256903496598379 | 0.0829509006333808 | 0.3467825524025669 | T | T | T |
| 0.8229171252582268 | 0.5650647897119760 | 0.5366699405172679 | T | T | T |
| 0.3293223641769994 | 0.0620185819101196 | 0.5353075790701763 | T | T | T |
| 0.0998439094680252 | 0.9726992018112537 | 0.6639584017488318 | T | T | T |
| 0.5910046816623628 | 0.4688555761940915 | 0.6765861826574461 | T | T | T |
| 0.3309726415978233 | 0.8185668996930843 | 0.3491859960704950 | T | T | T |
| 0.8278982721000288 | 0.3183788705902972 | 0.3458447500355569 | T | T | T |
| 0.6029021513950520 | 0.6846011964747032 | 0.6815342703064940 | T | T | T |
| 0.1084251858676314 | 0.1865160850796762 | 0.6831926610515067 | T | T | T |
| 0.8360011032372627 | 0.3284091914434518 | 0.5384220293780415 | T | T | T |
| 0.3359851692880759 | 0.8195845937685499 | 0.5453182817544324 | T | T | T |
| 0.5669244628316878 | 0.6956325945559534 | 0.4551396438478212 | T | T | T |
| 0.0619834888502303 | 0.1958805555522612 | 0.4615200737732760 | T | T | T |
| 0.3884230523715776 | 0.0675465066281198 | 0.3228586598473288 | T | T | T |
| 0.8885885628526127 | 0.5661395278746344 | 0.3209838622873479 | T | T | T |

|                    |                    |                    |   |   |   |
|--------------------|--------------------|--------------------|---|---|---|
| 0.8753001664710450 | 0.0860224151616127 | 0.5580742191209650 | T | T | T |
| 0.3731668988321864 | 0.5876405669564826 | 0.5652534334785133 | T | T | T |
| 0.0592604655712402 | 0.4585474847329098 | 0.4414186098045622 | T | T | T |
| 0.5617588918287103 | 0.9573762865195553 | 0.4419702618881632 | T | T | T |
| 0.8024793850130962 | 0.2135595332178840 | 0.6907011035452638 | T | T | T |
| 0.3241491544197035 | 0.4330184205520236 | 0.6783322088229555 | T | T | T |
| 0.8146266485418353 | 0.9364083178457249 | 0.6791803960408092 | T | T | T |
| 0.0957544540752075 | 0.3192810887433598 | 0.3148705222331851 | T | T | T |
| 0.5953374079071080 | 0.8209968840334464 | 0.3119623717368330 | T | T | T |
| 0.6117314948494778 | 0.8369822783435210 | 0.5721201431130664 | T | T | T |
| 0.1075678199659807 | 0.3400571040723840 | 0.5765083186938544 | T | T | T |
| 0.3298610797663590 | 0.4281035905673463 | 0.4584981890554497 | T | T | T |
| 0.8348723129458236 | 0.9276050490436294 | 0.4581526652298754 | T | T | T |
| 0.0919215824550402 | 0.0850914926070946 | 0.3127274415732229 | T | T | T |
| 0.5910225778205559 | 0.5832542195571420 | 0.3099288929776988 | T | T | T |
| 0.8322823478068538 | 0.7197023655622468 | 0.4362671506256715 | T | T | T |
| 0.3306415373905224 | 0.2211819360948866 | 0.4395986086527902 | T | T | T |
| 0.5984892731509838 | 0.0684978621219808 | 0.5847439100075182 | T | T | T |
| 0.0980681676384485 | 0.5686736634539123 | 0.5839042723738963 | T | T | T |
| 0.8749346919338202 | 0.6989393017703059 | 0.6694014149052644 | T | T | T |
| 0.3783384881845775 | 0.1953391418350961 | 0.6688609971610935 | T | T | T |
| 0.0324337662938101 | 0.8342500847359982 | 0.3247234327144568 | T | T | T |
| 0.5311394545167579 | 0.3359071926985310 | 0.3277666748419225 | T | T | T |
| 0.5589946045978196 | 0.3157710032200963 | 0.5678139872770209 | T | T | T |
| 0.0587207190851156 | 0.8126559688626053 | 0.5654938698904073 | T | T | T |
| 0.3692971146322558 | 0.9495948748627969 | 0.6853525062423336 | T | T | T |
| 0.8550364721719718 | 0.4517467274110533 | 0.6825053631028699 | T | T | T |
| 0.9713218706309037 | 0.2168947271908311 | 0.5836975864937218 | T | T | T |
| 0.4595303584889600 | 0.9311126057077928 | 0.3294563882908160 | T | T | T |
| 0.9598358426348365 | 0.4292631332752011 | 0.3288621261545500 | T | T | T |

|                    |                    |                    |   |   |   |
|--------------------|--------------------|--------------------|---|---|---|
| 0.4813365840638010 | 0.7132568704700084 | 0.5734878203650707 | T | T | T |
| 0.2184562541047324 | 0.5595381174691119 | 0.4636742087989343 | T | T | T |
| 0.2164352592176957 | 0.0909378217649585 | 0.4217101170368571 | T | T | T |
| 0.7180279148260591 | 0.5898367680435880 | 0.4182528371876089 | T | T | T |
| 0.7204397139597797 | 0.0590831976722568 | 0.4599255699455979 | T | T | T |
| 0.7493075334827267 | 0.5779156731709408 | 0.6657487888530641 | T | T | T |
| 0.1816364182060746 | 0.8243021942578498 | 0.4401325105691620 | T | T | T |
| 0.6819503597876715 | 0.3272143861514774 | 0.4398617522893441 | T | T | T |
| 0.2479498691202760 | 0.0751905078463661 | 0.6642040975659025 | T | T | T |
| 0.4668757105751198 | 0.1820284057726663 | 0.5480897402768868 | T | T | T |
| 0.9684019563334028 | 0.9715225761046269 | 0.3514902722068873 | T | T | T |
| 0.4651982066454124 | 0.4725069713268799 | 0.3527298092040024 | T | T | T |
| 0.9659904192014825 | 0.6816342379256872 | 0.5473163751800636 | T | T | T |
| 0.2156326409331293 | 0.8517410671907585 | 0.6539453244977665 | T | T | T |
| 0.2377918745913976 | 0.3021233002282183 | 0.6739829498720874 | T | T | T |
| 0.7343511697618612 | 0.8040304863505260 | 0.6736391370200115 | T | T | T |
| 0.7216211051334023 | 0.3402223560143636 | 0.6533997072293884 | T | T | T |
| 0.6831838271696661 | 0.8263311327057850 | 0.4382155882575742 | T | T | T |
| 0.2463584953963387 | 0.5810260312357964 | 0.6821232082762595 | T | T | T |
| 0.7545959269537483 | 0.0757275080264907 | 0.6689232683199814 | T | T | T |
| 0.1768513430077337 | 0.3253902561811681 | 0.4430463846341915 | T | T | T |
| 0.9616806499168369 | 0.1994788305713363 | 0.3403147943129727 | T | T | T |
| 0.4679190039904228 | 0.9489934045054850 | 0.5655701057909700 | T | T | T |
| 0.9690342576991116 | 0.6993653996231654 | 0.3378098634088213 | T | T | T |
| 0.4570548552828174 | 0.4470753872276068 | 0.5648253681673867 | T | T | T |
| 0.9658496350757373 | 0.9490732107621355 | 0.5653778851541238 | T | T | T |
| 0.4628338474766877 | 0.6996327230682788 | 0.3364844046992401 | T | T | T |
| 0.9647847380899376 | 0.4513402748323037 | 0.5645146425642301 | T | T | T |
| 0.4670284722101288 | 0.2008252610057442 | 0.3404513056724052 | T | T | T |
| 0.5178823717515557 | 0.4684269686229706 | 0.7169072920003807 | T | T | T |



**Table S11** Optimized fractional coordinates of the In<sub>2</sub>O<sub>3</sub>(110)-S3 surface.

O In H

|                     |                     |                     |
|---------------------|---------------------|---------------------|
| 1.0000000000000000  |                     |                     |
| 10.2136999999999993 | 0.0000000000000000  | 0.0000000000000000  |
| 0.0000000000000000  | 14.4443000000000001 | 0.0000000000000000  |
| 0.0000000000000000  | 0.0000000000000000  | 15.9873999999999992 |

|    |    |   |
|----|----|---|
| O  | In | H |
| 47 | 32 | 1 |

Selective dynamics

Direct

|                    |                    |                    |   |   |   |
|--------------------|--------------------|--------------------|---|---|---|
| 0.6093595752629349 | 0.1821033078725542 | 0.4362021308187917 | T | T | T |
| 0.1097336680146565 | 0.6821899620486447 | 0.4368255579133498 | T | T | T |
| 0.1086387357914821 | 0.9654253546145296 | 0.4559101211125159 | T | T | T |
| 0.6177095227839565 | 0.4635131053058318 | 0.4482490038451482 | T | T | T |
| 0.3264877465435439 | 0.5821969757916166 | 0.3489995435202032 | T | T | T |
| 0.8272920451994878 | 0.0831291909389608 | 0.3488325706920898 | T | T | T |
| 0.8261732959274620 | 0.5630135653822951 | 0.5349454924967666 | T | T | T |
| 0.3266984380667814 | 0.0653183256222889 | 0.5355155177742388 | T | T | T |
| 0.1017525811896484 | 0.9664413618048102 | 0.6661289818727572 | T | T | T |
| 0.5959181596662677 | 0.4686778021080418 | 0.6640552473977142 | T | T | T |
| 0.3269409383200048 | 0.8171524858192690 | 0.3445501253435044 | T | T | T |
| 0.8321629783806593 | 0.3176214207205609 | 0.3429065528327085 | T | T | T |
| 0.5947027074508637 | 0.6857351577686273 | 0.6944101842847290 | T | T | T |
| 0.1017947125342245 | 0.1807303959553364 | 0.6832125191713198 | T | T | T |
| 0.8403207208536467 | 0.3292814046868675 | 0.5376524846350488 | T | T | T |
| 0.3324271400416313 | 0.8326052958626914 | 0.5351637561367198 | T | T | T |
| 0.5594778189284041 | 0.6930242776806994 | 0.4626261576326673 | T | T | T |
| 0.0637753944646382 | 0.1980374503324785 | 0.4623626519733278 | T | T | T |
| 0.3893029261093647 | 0.0653088094496129 | 0.3227576875123411 | T | T | T |
| 0.8910460018941021 | 0.5654280684659968 | 0.3213461812150382 | T | T | T |

|                    |                    |                    |   |   |   |
|--------------------|--------------------|--------------------|---|---|---|
| 0.8759745200829179 | 0.0855636649009197 | 0.5588496095297064 | T | T | T |
| 0.3744652402151722 | 0.5786289623770549 | 0.5654452804026873 | T | T | T |
| 0.0641750755637951 | 0.4575333804731286 | 0.4438346387651216 | T | T | T |
| 0.5617857850962580 | 0.9562344544593434 | 0.4442965677731359 | T | T | T |
| 0.7998425764029899 | 0.2173063373147036 | 0.6887308800965040 | T | T | T |
| 0.3073123849313029 | 0.7180953456913833 | 0.6835627100405001 | T | T | T |
| 0.8125699868477201 | 0.9409428766137554 | 0.6830913306286240 | T | T | T |
| 0.1007133538631829 | 0.3204987564363142 | 0.3162894588036401 | T | T | T |
| 0.5956402208141826 | 0.8189416648981751 | 0.3173346646830593 | T | T | T |
| 0.6023106193687342 | 0.8327874362522050 | 0.5790507480099690 | T | T | T |
| 0.1171085280787739 | 0.3416194065409806 | 0.5800360247367169 | T | T | T |
| 0.3380374466117717 | 0.4272984216779601 | 0.4577140660752463 | T | T | T |
| 0.8320891829126180 | 0.9257631079613208 | 0.4618652691915695 | T | T | T |
| 0.0924399813582480 | 0.0850939227795607 | 0.3127065753794667 | T | T | T |
| 0.5907625903147973 | 0.5861986623020410 | 0.3096622999713509 | T | T | T |
| 0.8296829612321747 | 0.7192177739893623 | 0.4357456577781376 | T | T | T |
| 0.3319599426305056 | 0.2205853086334532 | 0.4366243483453552 | T | T | T |
| 0.5972760698900410 | 0.0716238889054015 | 0.5838920624042246 | T | T | T |
| 0.0987046585400818 | 0.5720032032035091 | 0.5851197821968760 | T | T | T |
| 0.8561216842152071 | 0.6965032115196174 | 0.6654004904083977 | T | T | T |
| 0.3731332966317887 | 0.1988014467943582 | 0.6684564274267611 | T | T | T |
| 0.0301965068826353 | 0.8348138103032650 | 0.3252786808405403 | T | T | T |
| 0.5321233583468684 | 0.3336031203393244 | 0.3220066227518978 | T | T | T |
| 0.5623926983194395 | 0.3139812455303513 | 0.5607488831503303 | T | T | T |
| 0.0550830950155577 | 0.8114049337780356 | 0.5649959179017310 | T | T | T |
| 0.3706603913155618 | 0.9529844120160335 | 0.6848962418021201 | T | T | T |
| 0.8669453017543493 | 0.4501141373790788 | 0.6850568018065472 | T | T | T |
| 0.9707564675823965 | 0.2175053473176978 | 0.5837865732517004 | T | T | T |
| 0.4588939906174104 | 0.9287571789332564 | 0.3317932890883711 | T | T | T |
| 0.9645875071875548 | 0.4295362262089489 | 0.3305318101591688 | T | T | T |

|                    |                    |                    |   |   |   |
|--------------------|--------------------|--------------------|---|---|---|
| 0.4549355547289781 | 0.7178590631590207 | 0.5782448568863878 | T | T | T |
| 0.2217309505574999 | 0.5583118877322932 | 0.4633247593956359 | T | T | T |
| 0.2163199703397375 | 0.0910255713157582 | 0.4215840333503286 | T | T | T |
| 0.7187502558121199 | 0.5909079371812304 | 0.4170798662327969 | T | T | T |
| 0.7204255123153520 | 0.0581612678178854 | 0.4612290580341468 | T | T | T |
| 0.7474988952623131 | 0.5692820582924116 | 0.6633567709611874 | T | T | T |
| 0.1794261209385675 | 0.8256255078643082 | 0.4387158385695688 | T | T | T |
| 0.6878044266357082 | 0.3219862404000488 | 0.4370408465500584 | T | T | T |
| 0.2457938622289920 | 0.0735154858011318 | 0.6648418607179858 | T | T | T |
| 0.4630558080315885 | 0.1844719639141685 | 0.5474485043137503 | T | T | T |
| 0.9660992757476515 | 0.9716292343097211 | 0.3528661171095869 | T | T | T |
| 0.4674843175999666 | 0.4705553009424163 | 0.3467781878880353 | T | T | T |
| 0.9638998118308421 | 0.6818836706616822 | 0.5466421894963575 | T | T | T |
| 0.2213103894345924 | 0.8473853111369696 | 0.6541423375460824 | T | T | T |
| 0.2268493742413826 | 0.3004398935205557 | 0.6866597574720390 | T | T | T |
| 0.7335925906612972 | 0.8098841556985440 | 0.6761769790902614 | T | T | T |
| 0.7203707779358544 | 0.3452050434263058 | 0.6525427592862911 | T | T | T |
| 0.6785545148557605 | 0.8239905066278890 | 0.4444129760258343 | T | T | T |
| 0.2482488964523235 | 0.5726666630431729 | 0.6805181908934923 | T | T | T |
| 0.7526155857541030 | 0.0798148085122095 | 0.6687226141794166 | T | T | T |
| 0.1824946753822858 | 0.3255327852057262 | 0.4450112123756998 | T | T | T |
| 0.9655992946655141 | 0.1998158593269153 | 0.3403837053967476 | T | T | T |
| 0.4654176679406749 | 0.9523410572946176 | 0.5658566165947400 | T | T | T |
| 0.9694699390881176 | 0.6992455431624333 | 0.3382685202634647 | T | T | T |
| 0.4836112708474546 | 0.4519144232884131 | 0.5534426328449465 | T | T | T |
| 0.9682764212282036 | 0.9489111444531397 | 0.5667742301977416 | T | T | T |
| 0.4609137917154781 | 0.6993942074674304 | 0.3400331569125717 | T | T | T |
| 0.9701047157867743 | 0.4509491582392016 | 0.5667152197820592 | T | T | T |
| 0.4676714114533566 | 0.1990882835350900 | 0.3380281371240584 | T | T | T |
| 0.5265973279121081 | 0.6792613736644580 | 0.7372794197115839 | T | T | T |

**Table S12** Optimized fractional coordinates of the  $\text{In}_2\text{O}_3(110)$ -S4 surface.

O In H

|                     |                     |                     |
|---------------------|---------------------|---------------------|
| 1.0000000000000000  |                     |                     |
| 10.2136999999999993 | 0.0000000000000000  | 0.0000000000000000  |
| 0.0000000000000000  | 14.4443000000000001 | 0.0000000000000000  |
| 0.0000000000000000  | 0.0000000000000000  | 15.9873999999999992 |

|    |    |   |
|----|----|---|
| O  | In | H |
| 47 | 32 | 1 |

Selective dynamics

Direct

|                    |                    |                    |   |   |   |
|--------------------|--------------------|--------------------|---|---|---|
| 0.6086157186081207 | 0.1847337515849393 | 0.4383476780325531 | T | T | T |
| 0.1099944229419230 | 0.6817260272170238 | 0.4363871751337154 | T | T | T |
| 0.1095121951051926 | 0.9663618553358275 | 0.4547548287242455 | T | T | T |
| 0.6155183799432066 | 0.4638613678334584 | 0.4517228810027190 | T | T | T |
| 0.3264824554165591 | 0.5827332176686219 | 0.3496338318895747 | T | T | T |
| 0.8262109065850830 | 0.0847973853281371 | 0.3483850393981373 | T | T | T |
| 0.8247949566440222 | 0.5638819115008145 | 0.5364198621790602 | T | T | T |
| 0.3270899062638569 | 0.0655460077143051 | 0.5347971320871996 | T | T | T |
| 0.1019113176229387 | 0.9664739401824464 | 0.6646908444388464 | T | T | T |
| 0.5828973816379139 | 0.4663798629332481 | 0.6736367429084120 | T | T | T |
| 0.3263637149461055 | 0.8180863406301504 | 0.3434189559785492 | T | T | T |
| 0.8318764315528867 | 0.3190891913269222 | 0.3425788981103930 | T | T | T |
| 0.6073514828520009 | 0.6817448318859453 | 0.6838419843614236 | T | T | T |
| 0.1027460723140906 | 0.1803001055092604 | 0.6831106204577795 | T | T | T |
| 0.8388785266089187 | 0.3270452607056533 | 0.5382692064832808 | T | T | T |
| 0.3371038224232549 | 0.8306633709425207 | 0.5350495465251602 | T | T | T |
| 0.5591668485749823 | 0.6928532243297144 | 0.4637764238096247 | T | T | T |
| 0.0628422787225230 | 0.1982329008811416 | 0.4611899567787910 | T | T | T |
| 0.3891276018888533 | 0.0667508513200070 | 0.3221850009040861 | T | T | T |
| 0.8895070495047980 | 0.5666267108853265 | 0.3219148724334480 | T | T | T |

|                    |                    |                    |   |   |   |
|--------------------|--------------------|--------------------|---|---|---|
| 0.8761817169238751 | 0.0851035784452449 | 0.5585598421450173 | T | T | T |
| 0.3750091198762864 | 0.5759611178965449 | 0.5668416526596787 | T | T | T |
| 0.0615437863268990 | 0.4573351943433783 | 0.4435413064595797 | T | T | T |
| 0.5615616594222951 | 0.9590329338861627 | 0.4428190424232619 | T | T | T |
| 0.8011173730771607 | 0.2124929087717128 | 0.6918241235227778 | T | T | T |
| 0.3018772110792859 | 0.7183316622763419 | 0.6811045072543422 | T | T | T |
| 0.8134315780804874 | 0.9361608946129421 | 0.6799876875798717 | T | T | T |
| 0.0991796110810852 | 0.3214064771096322 | 0.3149291127278935 | T | T | T |
| 0.5953355744171247 | 0.8190964986883207 | 0.3181899243172853 | T | T | T |
| 0.6056569616958034 | 0.8369310499683116 | 0.5769085240854169 | T | T | T |
| 0.1133047629189261 | 0.3417734734182389 | 0.5805612498237611 | T | T | T |
| 0.3346366427119599 | 0.4263675843037708 | 0.4553363843019484 | T | T | T |
| 0.8322936502312794 | 0.9269755995113584 | 0.4600945577800751 | T | T | T |
| 0.0915325702522950 | 0.0859951167111049 | 0.3117427467041051 | T | T | T |
| 0.5910754077780652 | 0.5861944903875765 | 0.3111368826152121 | T | T | T |
| 0.8298474964762407 | 0.7201252268723920 | 0.4372072528640341 | T | T | T |
| 0.3313179196140656 | 0.2216634828800338 | 0.4373679698166316 | T | T | T |
| 0.5978373458709685 | 0.0722243816184200 | 0.5840109605148869 | T | T | T |
| 0.0980893388332165 | 0.5695481375121345 | 0.5849876065605734 | T | T | T |
| 0.8778250094823282 | 0.6996216631875174 | 0.6684568965850052 | T | T | T |
| 0.3733293783936497 | 0.1992001933724023 | 0.6682927065587966 | T | T | T |
| 0.0299979746434628 | 0.8352367828419280 | 0.3250889350885416 | T | T | T |
| 0.5329651607937373 | 0.3346412392057875 | 0.3234460851172645 | T | T | T |
| 0.5616666025294896 | 0.3162844540203394 | 0.5656827559023618 | T | T | T |
| 0.0593232774745089 | 0.8128652746842410 | 0.5606508386740757 | T | T | T |
| 0.3710845952245559 | 0.9534646330921464 | 0.6841993572357159 | T | T | T |
| 0.8510619322423122 | 0.4511336015997642 | 0.6825232479903741 | T | T | T |
| 0.9727795529453181 | 0.2153011551457009 | 0.5832816072105734 | T | T | T |
| 0.4587264514791397 | 0.9295137157792847 | 0.3313204888603009 | T | T | T |
| 0.9638907286704563 | 0.4311513715892722 | 0.3292510094895935 | T | T | T |

|                    |                    |                    |   |   |   |
|--------------------|--------------------|--------------------|---|---|---|
| 0.4638039326670219 | 0.7158595912730358 | 0.5850572327398853 | T | T | T |
| 0.2204877310700450 | 0.5582397616395042 | 0.4635164326749179 | T | T | T |
| 0.2164028391269810 | 0.0912284885414804 | 0.4207660808513426 | T | T | T |
| 0.7168181111354908 | 0.5926766680208649 | 0.4195106673748374 | T | T | T |
| 0.7202495481066077 | 0.0591520511248115 | 0.4609587016270272 | T | T | T |
| 0.7509521885813898 | 0.5786964182687997 | 0.6647512369677213 | T | T | T |
| 0.1818229938905655 | 0.8260562375171052 | 0.4391605842594258 | T | T | T |
| 0.6879989240509278 | 0.3234366356605415 | 0.4362167388988189 | T | T | T |
| 0.2464262017022432 | 0.0730095563163333 | 0.6643305634601571 | T | T | T |
| 0.4629083925831503 | 0.1841145535284442 | 0.5480145225258500 | T | T | T |
| 0.9658997059958955 | 0.9722496026527221 | 0.3526690136378320 | T | T | T |
| 0.4674566063578049 | 0.4716601735035381 | 0.3466346323670447 | T | T | T |
| 0.9675679261472078 | 0.6828849876967906 | 0.5467003868403657 | T | T | T |
| 0.2221784132395706 | 0.8478653703779320 | 0.6521914127749108 | T | T | T |
| 0.2262809595953751 | 0.3005483409068659 | 0.6866667996297953 | T | T | T |
| 0.7336582944771319 | 0.8030134131177697 | 0.6747810468611890 | T | T | T |
| 0.7221253028974812 | 0.3380380055839489 | 0.6531017911124847 | T | T | T |
| 0.6778079447840630 | 0.8251147174865936 | 0.4451814759656056 | T | T | T |
| 0.2462139531302942 | 0.5756183140649010 | 0.6810863083263712 | T | T | T |
| 0.7539439276935221 | 0.0746936883545216 | 0.6686252932116534 | T | T | T |
| 0.1792223595918144 | 0.3254431907529164 | 0.4441401528395915 | T | T | T |
| 0.9646501478004201 | 0.2004441022405482 | 0.3390068156450444 | T | T | T |
| 0.4661805210181750 | 0.9519012259817232 | 0.5650577930754609 | T | T | T |
| 0.9681214928199395 | 0.7004314262584103 | 0.3388453854376672 | T | T | T |
| 0.4756666640844506 | 0.4491401801206141 | 0.5518131017004153 | T | T | T |
| 0.9672209035526578 | 0.9476588530856582 | 0.5661994768410756 | T | T | T |
| 0.4605874185195409 | 0.7002501862739420 | 0.3417936496136370 | T | T | T |
| 0.9660610388520732 | 0.4508536584091912 | 0.5659406577538885 | T | T | T |
| 0.4673475830906282 | 0.1999762998517632 | 0.3390194088571469 | T | T | T |
| 0.5211092300335424 | 0.4747883728899168 | 0.7199034918364299 | T | T | T |

**Table S13** Optimized fractional coordinates of the  $\text{In}_2\text{O}_3(111)$  surface.

In O

|                     |                     |                     |
|---------------------|---------------------|---------------------|
| 1.0000000000000000  |                     |                     |
| 12.5091307398835667 | -7.2221499999999965 | 0.0000000000000000  |
| 0.0000000000000000  | 14.4442999999999984 | 0.0000000000000000  |
| 0.0000000000000000  | 0.0000000000000000  | 17.9854999999999947 |

In O

48 72

Selective dynamics

Direct

|                    |                    |                    |   |   |   |
|--------------------|--------------------|--------------------|---|---|---|
| 0.8500809444936821 | 0.4045036595857753 | 0.3542195540493439 | T | T | T |
| 0.5138229468809062 | 0.7386560570138637 | 0.5111613969919945 | T | T | T |
| 0.1806750317032665 | 0.0790187971616122 | 0.6824957380599512 | T | T | T |
| 0.8277571334974981 | 0.9294225228063953 | 0.3276317804376821 | T | T | T |
| 0.4945211786853351 | 0.2704020369207308 | 0.4977907120424756 | T | T | T |
| 0.1589169157445829 | 0.6040686346645308 | 0.6564527754039717 | T | T | T |
| 0.3218856569574425 | 0.4351411757060403 | 0.3323891963249714 | T | T | T |
| 0.9928486717518420 | 0.7633222602196992 | 0.4920480478395570 | T | T | T |
| 0.6579861199458635 | 0.0987169216582923 | 0.6697763540177918 | T | T | T |
| 0.8334094025559138 | 0.6774537827197109 | 0.3415637289879394 | T | T | T |
| 0.5037947590415874 | 0.0037682702683913 | 0.5051523731830985 | T | T | T |
| 0.1751808266568662 | 0.3314855617864802 | 0.6688044756341432 | T | T | T |
| 0.1172715502786135 | 0.6865156174885054 | 0.3324261345601571 | T | T | T |
| 0.7747533514681283 | 0.0155779366945361 | 0.4919923148036257 | T | T | T |
| 0.4451456159351783 | 0.3504750041297309 | 0.6694806222523451 | T | T | T |
| 0.6038474677536780 | 0.4497712236958051 | 0.3541237456909135 | T | T | T |
| 0.2697823720885056 | 0.7795366664217747 | 0.5112088596604204 | T | T | T |
| 0.9294611601282783 | 0.1055907195201917 | 0.6824724780580340 | T | T | T |
| 0.0987416371035029 | 0.4452744311243326 | 0.3397849351241166 | T | T | T |
| 0.7631727212586854 | 0.7748554452468859 | 0.5182333759960590 | T | T | T |

|                    |                    |                    |   |   |   |
|--------------------|--------------------|--------------------|---|---|---|
| 0.4353576618260422 | 0.1173978667271608 | 0.6769775254689681 | T | T | T |
| 0.0789917068407239 | 0.9027646744852916 | 0.3277050490583368 | T | T | T |
| 0.7380861014193039 | 0.2282664392259226 | 0.4979310332719822 | T | T | T |
| 0.4045200655230523 | 0.5589762670044928 | 0.6563016931414548 | T | T | T |
| 0.5632142886722653 | 0.6579312500427240 | 0.3396209389787797 | T | T | T |
| 0.2336680699950442 | 0.9925960000529829 | 0.5183713252875441 | T | T | T |
| 0.8911185108587395 | 0.3219261031264791 | 0.6770022516460161 | T | T | T |
| 0.8481624663802030 | 0.1750843956826564 | 0.3415413529516673 | T | T | T |
| 0.5042961920125884 | 0.5046974967263488 | 0.5048945985399252 | T | T | T |
| 0.1607248263460702 | 0.8332978337220264 | 0.6689981147948174 | T | T | T |
| 0.5586380962730252 | 0.1582967402247905 | 0.3542440868344681 | T | T | T |
| 0.2289008912735488 | 0.4944784586760028 | 0.5113388343844859 | T | T | T |
| 0.9027289626938524 | 0.8277337957613863 | 0.6823889933706863 | T | T | T |
| 0.1056611540934499 | 0.1806231102931692 | 0.3276541129266146 | T | T | T |
| 0.7801619702301138 | 0.5138836361434684 | 0.4977738819381910 | T | T | T |
| 0.4493454108581366 | 0.8495408061703416 | 0.6565882945580377 | T | T | T |
| 0.5732831146647486 | 0.8912540435376815 | 0.3323123527786032 | T | T | T |
| 0.2451198005687269 | 0.2336306212551799 | 0.4919704271201749 | T | T | T |
| 0.9096586931388304 | 0.5631651911287900 | 0.6696467749749881 | T | T | T |
| 0.3505810747116694 | 0.9097132124290693 | 0.3397978528350354 | T | T | T |
| 0.0158788327807891 | 0.2451505373570745 | 0.5182877111584386 | T | T | T |
| 0.6864235755278916 | 0.5731040141264720 | 0.6767238584363678 | T | T | T |
| 0.3310341492333717 | 0.1602567185484074 | 0.3415228041594024 | T | T | T |
| 0.0046885636529963 | 0.5041799275722890 | 0.5051149289931149 | T | T | T |
| 0.6768592643818356 | 0.8476617221951566 | 0.6688446635015910 | T | T | T |
| 0.3375097316283964 | 0.6709888279138871 | 0.3215634782825280 | T | T | T |
| 0.0042578701038490 | 0.0041622799461408 | 0.5051681487211593 | T | T | T |
| 0.6709531613504223 | 0.3374796525500871 | 0.6869935647246891 | T | T | T |
| 0.2644446002681504 | 0.7486402079214967 | 0.3952477224264732 | T | T | T |
| 0.9220462980075321 | 0.0781695507270408 | 0.5631041122953160 | T | T | T |



|                     |                    |                    |   |   |   |
|---------------------|--------------------|--------------------|---|---|---|
| 0.5949157240385862  | 0.4232099250045144 | 0.7317735810170080 | T | T | T |
| 0.0134723656577871  | 0.5316858764644339 | 0.3845635171133607 | T | T | T |
| 0.6759408713589378  | 0.8629419479166539 | 0.5481466660996202 | T | T | T |
| 0.3414461364438285  | 0.1893953070831206 | 0.7119664664992702 | T | T | T |
| 0.9366635505952305  | 0.0973107868867479 | 0.3040279606620748 | T | T | T |
| 0.6124064999133844  | 0.4388479721967486 | 0.4746790285812690 | T | T | T |
| 0.2821169574903071  | 0.7761246936878315 | 0.6579346749168332 | T | T | T |
| 0.9110535083652704  | 0.8436970069908274 | 0.3040735289713766 | T | T | T |
| 0.5697132052780187  | 0.1778061563366523 | 0.4747967801341684 | T | T | T |
| 0.2323667398756993  | 0.5100879071397970 | 0.6569183555069200 | T | T | T |
| 0.5223353702474590  | 0.9949035048747900 | 0.3845768833335632 | T | T | T |
| 0.1911824005658833  | 0.3322607610345154 | 0.5481228381234706 | T | T | T |
| 0.8522202571513062  | 0.6669637981600006 | 0.7118554598568317 | T | T | T |
| 0.4234327776001178  | 0.8330078921728271 | 0.2769889489362580 | T | T | T |
| 0.0784625440669722  | 0.1605545252976714 | 0.4470699883260181 | T | T | T |
| 0.7488148627076161  | 0.4883415466633984 | 0.6137072455181877 | T | T | T |
| 0.4036215187507700  | 0.0725374473755653 | 0.3064124307298027 | T | T | T |
| 0.0638146304187964  | 0.3988522103795256 | 0.4712344544018158 | T | T | T |
| 0.7271726412433743  | 0.7340374485842457 | 0.6404959069924911 | T | T | T |
| -0.0025846106960813 | 0.7271979195498840 | 0.3692966709361594 | T | T | T |
| 0.6685776256254956  | 0.0631501661444792 | 0.5383742960969593 | T | T | T |
| 0.3356093247619965  | 0.4034520653574431 | 0.7034070668899186 | T | T | T |
| 0.7263959024071964  | 0.2321054637142528 | 0.3547163469531908 | T | T | T |
| 0.3962557693595514  | 0.5707296234058867 | 0.5354340361617917 | T | T | T |
| 0.0717996262990050  | 0.9110512418945641 | 0.7060460654118271 | T | T | T |
| 0.6731602211913008  | 0.6048615986444243 | 0.3062430542277285 | T | T | T |
| 0.3393627181190814  | 0.9446657850271803 | 0.4712330584751764 | T | T | T |
| 0.0111773550129988  | 0.2811628799921789 | 0.6406104896212972 | T | T | T |
| 0.7338839081603730  | 0.0110902147819580 | 0.3692535549100626 | T | T | T |
| 0.3989570811821756  | 0.3398984436409397 | 0.5382725750135251 | T | T | T |

|                    |                    |                    |   |   |   |
|--------------------|--------------------|--------------------|---|---|---|
| 0.0720227090156067 | 0.6727729628815639 | 0.7034500129972681 | T | T | T |
| 0.4882872015263747 | 0.7440758117253294 | 0.3951643847025866 | T | T | T |
| 0.1604863991778245 | 0.0863507705799444 | 0.5631228913921225 | T | T | T |
| 0.8325995466686473 | 0.4133861947286176 | 0.7319826655531068 | T | T | T |
| 0.5099029521420717 | 0.2820571405974129 | 0.3547881166325734 | T | T | T |
| 0.1788381575626414 | 0.6123686024943191 | 0.5355974409729403 | T | T | T |
| 0.8435603022402220 | 0.9365472440168445 | 0.7059376292856946 | T | T | T |
| 0.1646723255801799 | 0.0716854571308834 | 0.3040362378220736 | T | T | T |
| 0.8307165270275606 | 0.3959651109598908 | 0.4747864958942796 | T | T | T |
| 0.4983006405544796 | 0.7263303898434154 | 0.6573715231515352 | T | T | T |
| 0.9358338445101493 | 0.3353497063118198 | 0.3063538407292991 | T | T | T |
| 0.6095419131346294 | 0.6692191296551877 | 0.4709928584853190 | T | T | T |
| 0.2744470362788321 | 0.9972392840663123 | 0.6406994350097471 | T | T | T |
| 0.6671920254284155 | 0.8191102803336361 | 0.2974605182081410 | T | T | T |
| 0.3318495587961717 | 0.1451360313528982 | 0.4620337859020366 | T | T | T |
| 0.9957050930576546 | 0.4768016567639731 | 0.6254222544579591 | T | T | T |
| 0.2597243650166178 | 0.5201018262114913 | 0.3952771971300745 | T | T | T |
| 0.9301699364646060 | 0.8479101768093456 | 0.5630331920199682 | T | T | T |
| 0.5852880812592931 | 0.1758460311909184 | 0.7319953984841103 | T | T | T |
| 0.4767843523725914 | 0.4860924547017849 | 0.3843375148164274 | T | T | T |
| 0.1455124958713108 | 0.8172629912177964 | 0.5482594595217233 | T | T | T |
| 0.8191602685714982 | 0.1560517536694075 | 0.7120855447672412 | T | T | T |
| 0.4135412343089528 | 0.5849804210051567 | 0.2769903065364335 | T | T | T |
| 0.0864242691618430 | 0.9299198983456117 | 0.4471159730549272 | T | T | T |
| 0.7441406276133824 | 0.2595971720296235 | 0.6138731134749126 | T | T | T |
| 0.2812533001335237 | 0.2745423447059086 | 0.3692494108288120 | T | T | T |
| 0.9452077849820055 | 0.6095124894476639 | 0.5383281095255459 | T | T | T |
| 0.6050330414450916 | 0.9362913142376252 | 0.7035640059649284 | T | T | T |
| 0.1755077584254578 | 0.5949379951062530 | 0.2770521005771936 | T | T | T |
| 0.8477388123891814 | 0.9220719637333299 | 0.4470573144668720 | T | T | T |

|                    |                    |                    |   |   |   |
|--------------------|--------------------|--------------------|---|---|---|
| 0.5199782518550790 | 0.2642586357589973 | 0.6137136445991790 | T | T | T |
| 0.1558490414071953 | 0.3412029686989609 | 0.2975711255836577 | T | T | T |
| 0.8175119588336982 | 0.6765962762185493 | 0.4620138337493547 | T | T | T |
| 0.4855482353718759 | 0.0127560113713220 | 0.6254660803669708 | T | T | T |
| 0.1894665188463235 | 0.8526337265709131 | 0.2976754350786479 | T | T | T |
| 0.8632759151580081 | 0.1908220307338539 | 0.4620436151155667 | T | T | T |
| 0.5316014412725071 | 0.5229205705705742 | 0.6252024979827161 | T | T | T |
| 0.7763234659357114 | 0.4985463140754134 | 0.3548300134583792 | T | T | T |
| 0.4374825360438042 | 0.8295094366822340 | 0.5357047018998514 | T | T | T |
| 0.0974520221217874 | 0.1648692009548510 | 0.7060193027034253 | T | T | T |

**Table S14** Optimized fractional coordinates of the In<sub>2</sub>O<sub>3</sub>(111)-S1 surface.

In O H

|                     |                     |                     |
|---------------------|---------------------|---------------------|
| 1.0000000000000000  |                     |                     |
| 12.5091307398836005 | -7.2221500000000001 | 0.0000000000000000  |
| 0.0000000000000000  | 14.4443000000000001 | 0.0000000000000000  |
| 0.0000000000000000  | 0.0000000000000000  | 17.9854999999999983 |

|    |    |   |
|----|----|---|
| In | O  | H |
| 48 | 71 | 1 |

Selective dynamics

Direct

|                    |                    |                    |   |   |   |
|--------------------|--------------------|--------------------|---|---|---|
| 0.8508074533518069 | 0.4053437404659055 | 0.3551996836572180 | T | T | T |
| 0.5153179328140232 | 0.7407234097662920 | 0.5093467173603636 | T | T | T |
| 0.1682112991962083 | 0.0687924315772617 | 0.6811550697089387 | T | T | T |
| 0.8276119980561034 | 0.9290402106117480 | 0.3264451812333981 | T | T | T |
| 0.4937075651823361 | 0.2692265158391997 | 0.4952802093579837 | T | T | T |
| 0.1617162244959067 | 0.6016073736744773 | 0.6605652031539070 | T | T | T |
| 0.3222527387176852 | 0.4347928374036872 | 0.3280001756740565 | T | T | T |
| 0.9936519625563409 | 0.7630932968831882 | 0.4928903387168785 | T | T | T |
| 0.6606744848885944 | 0.0981539823587295 | 0.6688499393286247 | T | T | T |
| 0.8338847403954106 | 0.6774498177829482 | 0.3418292408873165 | T | T | T |
| 0.5050807586998249 | 0.0029316412283489 | 0.5033442871217175 | T | T | T |
| 0.1802530397325879 | 0.3314262432413476 | 0.6695865595293883 | T | T | T |
| 0.1170934462485321 | 0.6865623124312782 | 0.3319473931769273 | T | T | T |
| 0.7755822862107665 | 0.0156490928851585 | 0.4910867745650449 | T | T | T |
| 0.4466098321807734 | 0.3537212705947423 | 0.6619201465333479 | T | T | T |
| 0.6038792690931151 | 0.4503807474227833 | 0.3550595250482276 | T | T | T |
| 0.2700947150667196 | 0.7783618340693705 | 0.5109800586462169 | T | T | T |
| 0.9296068064480385 | 0.1048007121238153 | 0.6822325699404173 | T | T | T |
| 0.0978220437663379 | 0.4450365433179522 | 0.3357085989902141 | T | T | T |
| 0.7635684970453988 | 0.7744676049830385 | 0.5176713816642305 | T | T | T |

|                    |                    |                    |   |   |   |
|--------------------|--------------------|--------------------|---|---|---|
| 0.4381828483260747 | 0.1115883846527963 | 0.6758956454469562 | T | T | T |
| 0.0789162745185965 | 0.9024535240556196 | 0.3274561864964626 | T | T | T |
| 0.7388851980365309 | 0.2284575729404837 | 0.4975660625528444 | T | T | T |
| 0.4034763025253077 | 0.5648221503837469 | 0.6555642409427390 | T | T | T |
| 0.5632820844621573 | 0.6582588211105241 | 0.3364324678874167 | T | T | T |
| 0.2341124537270078 | 0.9931368124600092 | 0.5171474072115573 | T | T | T |
| 0.8932085350761834 | 0.3216892198184664 | 0.6769618756461968 | T | T | T |
| 0.8479927425090272 | 0.1751313993517740 | 0.3409618282009697 | T | T | T |
| 0.5021972446836994 | 0.5057929675766919 | 0.5032128321826439 | T | T | T |
| 0.1623852194072882 | 0.8310948367080921 | 0.6703511425418069 | T | T | T |
| 0.5591995900795181 | 0.1583756424427410 | 0.3539952137214892 | T | T | T |
| 0.2293461127971514 | 0.4938957101945551 | 0.5037215750756482 | T | T | T |
| 0.9001194502556278 | 0.8237349698792136 | 0.6822637100933688 | T | T | T |
| 0.1051161471749438 | 0.1806766302748234 | 0.3265316909859849 | T | T | T |
| 0.7799925986553208 | 0.5138247581345623 | 0.4982268678571971 | T | T | T |
| 0.4508209143864590 | 0.8498466009565185 | 0.6563015572662446 | T | T | T |
| 0.5735152605176033 | 0.8913943741718267 | 0.3304842097314056 | T | T | T |
| 0.2442193284503757 | 0.2345516844447925 | 0.4902925856416958 | T | T | T |
| 0.9107338896692331 | 0.5626349935920113 | 0.6702296143334929 | T | T | T |
| 0.3502216860518368 | 0.9096867077114450 | 0.3383682356173533 | T | T | T |
| 0.0160785658417167 | 0.2456690935490662 | 0.5184576414840266 | T | T | T |
| 0.6859540485796944 | 0.5727370148377114 | 0.6781251692769352 | T | T | T |
| 0.3303699091785542 | 0.1600731361253258 | 0.3403572581796062 | T | T | T |
| 0.0061571362001479 | 0.5045397198247069 | 0.5059669773957884 | T | T | T |
| 0.6783104294534837 | 0.8488654310430293 | 0.6682885820400477 | T | T | T |
| 0.3375898141766521 | 0.6713655151403839 | 0.3185797156363183 | T | T | T |
| 0.0035988612435836 | 0.0035463572689284 | 0.5038117619474395 | T | T | T |
| 0.6716131809201964 | 0.3367737477144615 | 0.6868018691172666 | T | T | T |
| 0.2642971178509714 | 0.7480896784928815 | 0.3951263791068780 | T | T | T |
| 0.9226899055081049 | 0.0777753592032699 | 0.5628508249746514 | T | T | T |

|                     |                    |                    |   |   |   |
|---------------------|--------------------|--------------------|---|---|---|
| 0.5899945899968351  | 0.4195973741269401 | 0.7296254609352352 | T | T | T |
| 0.0145891220768967  | 0.5322720844663614 | 0.3851759381662883 | T | T | T |
| 0.6775519475756183  | 0.8634489050789272 | 0.5476513933740160 | T | T | T |
| 0.3383272847964964  | 0.1944364445399256 | 0.7241018789141308 | T | T | T |
| 0.9364273617749018  | 0.0973737275928364 | 0.3037993690322678 | T | T | T |
| 0.6104793812563347  | 0.4392590510705343 | 0.4768742289310164 | T | T | T |
| 0.2833320949210544  | 0.7770981001759936 | 0.6590738279320590 | T | T | T |
| 0.9111149525872312  | 0.8431433567940178 | 0.3040497462174207 | T | T | T |
| 0.5698345547951782  | 0.1772477278606131 | 0.4754956850433250 | T | T | T |
| 0.2395671102784576  | 0.5108387424975699 | 0.6792316671699669 | T | T | T |
| 0.5221168515991219  | 0.9945715080589717 | 0.3833504582091265 | T | T | T |
| 0.1935839042515173  | 0.3360163883727628 | 0.5469934295149239 | T | T | T |
| 0.8504479389811940  | 0.6638521055983475 | 0.7140064776078947 | T | T | T |
| 0.4231211350512893  | 0.8332611166545326 | 0.2756573047025020 | T | T | T |
| 0.0788777828338756  | 0.1610838791938163 | 0.4468790730783127 | T | T | T |
| 0.7461743246003679  | 0.4867415309896250 | 0.6144509209457675 | T | T | T |
| 0.4043640288388093  | 0.0734090330335819 | 0.3057870590941870 | T | T | T |
| 0.0636978615820142  | 0.3986090577848246 | 0.4692535193901632 | T | T | T |
| 0.7254024681435030  | 0.7311321111430429 | 0.6402344977175164 | T | T | T |
| -0.0019090896183959 | 0.7274010805692904 | 0.3704584234025686 | T | T | T |
| 0.6695912539496921  | 0.0632865223337920 | 0.5386180948510342 | T | T | T |
| 0.7268834652505268  | 0.2325899993722211 | 0.3564047198766725 | T | T | T |
| 0.3939461013611365  | 0.5717763639082030 | 0.5349662537676083 | T | T | T |
| 0.0692427712003768  | 0.9036716834781252 | 0.7070407107968454 | T | T | T |
| 0.6732382885264606  | 0.6045393739546848 | 0.3061983434919559 | T | T | T |
| 0.3397404575378940  | 0.9449920053409309 | 0.4716878770588299 | T | T | T |
| 0.0141953315509184  | 0.2800254681111025 | 0.6407643507639158 | T | T | T |
| 0.7335988893533631  | 0.0106664134348226 | 0.3689237267230120 | T | T | T |
| 0.3985102546896716  | 0.3409781976339489 | 0.5390039653073179 | T | T | T |
| 0.0727390846261977  | 0.6703967991547475 | 0.7046743588637115 | T | T | T |

|                    |                    |                    |   |   |   |
|--------------------|--------------------|--------------------|---|---|---|
| 0.4886627426719400 | 0.7435929713092841 | 0.3932889453505262 | T | T | T |
| 0.1610279847106719 | 0.0862286145440143 | 0.5633012708152682 | T | T | T |
| 0.8325616790988708 | 0.4125409747726430 | 0.7315723274104515 | T | T | T |
| 0.5096720884406152 | 0.2821629028244134 | 0.3577424630205113 | T | T | T |
| 0.1827903454960576 | 0.6100625622609469 | 0.5389013096755273 | T | T | T |
| 0.8439818668089968 | 0.9350696905442054 | 0.7056830657323803 | T | T | T |
| 0.1642090098537579 | 0.0715246622838425 | 0.3041228520863312 | T | T | T |
| 0.8317890750498346 | 0.3968154228313281 | 0.4762907866468614 | T | T | T |
| 0.5018624713500967 | 0.7303716323364801 | 0.6541891847561028 | T | T | T |
| 0.9348583952931573 | 0.3357952919695552 | 0.3049978732623503 | T | T | T |
| 0.6089020466461160 | 0.6686794476470070 | 0.4716194576254475 | T | T | T |
| 0.2755751308327156 | 0.0050395529148572 | 0.6465376140600840 | T | T | T |
| 0.6671474498711661 | 0.8195331658312712 | 0.2948859571433915 | T | T | T |
| 0.3305147852120602 | 0.1462412403473045 | 0.4615957290151727 | T | T | T |
| 0.9985976318954677 | 0.4756987975961244 | 0.6262418595680739 | T | T | T |
| 0.2599681649739310 | 0.5204347297111890 | 0.3900493537427308 | T | T | T |
| 0.9304979270064848 | 0.8477437103586145 | 0.5634474621275949 | T | T | T |
| 0.5848966530102149 | 0.1751064628206095 | 0.7320715009799278 | T | T | T |
| 0.4757547985151917 | 0.4865659183423310 | 0.3833778787607493 | T | T | T |
| 0.1481795112009031 | 0.8195605774313004 | 0.5500697478537603 | T | T | T |
| 0.8206573344592648 | 0.1566753775582697 | 0.7124249395377573 | T | T | T |
| 0.4141257472396161 | 0.5852667329837675 | 0.2738339079674996 | T | T | T |
| 0.0870266269228103 | 0.9297893151609991 | 0.4473949250327228 | T | T | T |
| 0.7436797185893944 | 0.2591306511040874 | 0.6144147964766973 | T | T | T |
| 0.2815052567807724 | 0.2754900765955813 | 0.3681192411994809 | T | T | T |
| 0.9457748452857109 | 0.6093463418230721 | 0.5407460213417603 | T | T | T |
| 0.6063103837227197 | 0.9372939573866788 | 0.7043904215685126 | T | T | T |
| 0.1748991967956015 | 0.5958263365961233 | 0.2750920317553965 | T | T | T |
| 0.8479199542326802 | 0.9212350407322519 | 0.4460887482062597 | T | T | T |
| 0.5088053851107665 | 0.2570146267797025 | 0.6141646469008416 | T | T | T |

|                    |                    |                    |   |   |   |
|--------------------|--------------------|--------------------|---|---|---|
| 0.1558216836559397 | 0.3409111285679322 | 0.2945229150230081 | T | T | T |
| 0.8180489044975020 | 0.6760810140940593 | 0.4626901567023251 | T | T | T |
| 0.4869533260194656 | 0.0110277668201908 | 0.6238624679576835 | T | T | T |
| 0.1893515427516556 | 0.8524020738173056 | 0.2967344846486240 | T | T | T |
| 0.8638855197273996 | 0.1909102962346161 | 0.4618157291841994 | T | T | T |
| 0.5238285174846590 | 0.5227323487783782 | 0.6289037215350344 | T | T | T |
| 0.7759695933287108 | 0.4985678476826974 | 0.3573287641315377 | T | T | T |
| 0.4377576567596724 | 0.8296740327237441 | 0.5348698206079908 | T | T | T |
| 0.0970739793238673 | 0.1608193273804745 | 0.7091672927750861 | T | T | T |
| 0.3412907279956475 | 0.2105820204171609 | 0.7772476113582458 | T | T | T |



**Table S15** Optimized fractional coordinates of the In<sub>2</sub>O<sub>3</sub>(111)-S2 surface.

In O H

|                     |                     |                     |
|---------------------|---------------------|---------------------|
| 1.0000000000000000  |                     |                     |
| 12.5091307398836005 | -7.2221500000000001 | 0.0000000000000000  |
| 0.0000000000000000  | 14.4443000000000001 | 0.0000000000000000  |
| 0.0000000000000000  | 0.0000000000000000  | 17.9854999999999983 |

|    |    |   |
|----|----|---|
| In | O  | H |
| 48 | 71 | 1 |

Selective dynamics

Direct

|                    |                    |                    |   |   |   |
|--------------------|--------------------|--------------------|---|---|---|
| 0.8511526260876371 | 0.4058853892055009 | 0.3552831502090294 | T | T | T |
| 0.5144278084104660 | 0.7397229246986252 | 0.5115662822020711 | T | T | T |
| 0.1777192108349129 | 0.0764296405628012 | 0.6819430775801471 | T | T | T |
| 0.8277632496698907 | 0.9290100806350134 | 0.3262361905391851 | T | T | T |
| 0.4947670139959712 | 0.2702622389317283 | 0.4948189587340523 | T | T | T |
| 0.1619352553697199 | 0.6024234247162948 | 0.6611503326379837 | T | T | T |
| 0.3219866507986795 | 0.4344017282873824 | 0.3290015122967286 | T | T | T |
| 0.9930299444739668 | 0.7625128694260890 | 0.4929016166532458 | T | T | T |
| 0.6593504811877708 | 0.0982207371531012 | 0.6682075175724864 | T | T | T |
| 0.8338580798120144 | 0.6776624215010377 | 0.3416039133118386 | T | T | T |
| 0.5036708086783235 | 0.0032872548755673 | 0.5045311436408764 | T | T | T |
| 0.1781374605811900 | 0.3309399893361455 | 0.6695724742878513 | T | T | T |
| 0.1172078914347468 | 0.6863450815109947 | 0.3325537367899111 | T | T | T |
| 0.7752886604299332 | 0.0157504744211767 | 0.4907969055125044 | T | T | T |
| 0.4297976708634089 | 0.3420837801754416 | 0.6599181326320867 | T | T | T |
| 0.6037096850077119 | 0.4504478931748164 | 0.3543310730857656 | T | T | T |
| 0.2694272469805782 | 0.7776534287959574 | 0.5111965528003580 | T | T | T |
| 0.9297522171851108 | 0.1053185279738971 | 0.6820899665331288 | T | T | T |
| 0.0979551998606245 | 0.4449707852260275 | 0.3372637332075679 | T | T | T |
| 0.7640070859713907 | 0.7757766368331744 | 0.5171304088323058 | T | T | T |

|                    |                    |                    |   |   |   |
|--------------------|--------------------|--------------------|---|---|---|
| 0.4357162973171336 | 0.1179492842540523 | 0.6764357540922060 | T | T | T |
| 0.0790165178643137 | 0.9022462601094469 | 0.3278882760947091 | T | T | T |
| 0.7388848123118357 | 0.2274253660013386 | 0.4951748698775205 | T | T | T |
| 0.4037333365291275 | 0.5631726637109179 | 0.6581785428393371 | T | T | T |
| 0.5625489776384455 | 0.6577722777448053 | 0.3370774522902797 | T | T | T |
| 0.2337005077377461 | 0.9921951922589247 | 0.5179705759408491 | T | T | T |
| 0.8942025233372684 | 0.3218061932469378 | 0.6765822479409339 | T | T | T |
| 0.8485157391310403 | 0.1750284289684894 | 0.3401727153107088 | T | T | T |
| 0.5022267906919426 | 0.5047929047223618 | 0.5038265777882683 | T | T | T |
| 0.1617823795256284 | 0.8322744646866258 | 0.6697494428419852 | T | T | T |
| 0.5588079335445729 | 0.1577422827259869 | 0.3541932932221474 | T | T | T |
| 0.2296795888364194 | 0.4932237106879336 | 0.5053396919643552 | T | T | T |
| 0.9031631695650117 | 0.8280072550723743 | 0.6824776290375868 | T | T | T |
| 0.1049703887565174 | 0.1801652711207384 | 0.3260560758262975 | T | T | T |
| 0.7793467786578002 | 0.5137248857952066 | 0.4976272009856121 | T | T | T |
| 0.4496506543186892 | 0.8512266772797344 | 0.6566823109752116 | T | T | T |
| 0.5732897452551622 | 0.8908792212804637 | 0.3319503156614485 | T | T | T |
| 0.2427737341617336 | 0.2324664591579289 | 0.4897173863073845 | T | T | T |
| 0.9113535537878877 | 0.5639112275128134 | 0.6699646569996304 | T | T | T |
| 0.3503313657877767 | 0.9093792734143874 | 0.3395758194382923 | T | T | T |
| 0.0158405244600488 | 0.2451425184507826 | 0.5178990035586278 | T | T | T |
| 0.6880120386202021 | 0.5780288192003428 | 0.6746767719933179 | T | T | T |
| 0.3302682749616122 | 0.1593428850875972 | 0.3407292655240702 | T | T | T |
| 0.0059312668630801 | 0.5042959268398596 | 0.5066262986470770 | T | T | T |
| 0.6779540103145453 | 0.8505370664460481 | 0.6679692619759483 | T | T | T |
| 0.3374225616138147 | 0.6709111037771390 | 0.3196855373648117 | T | T | T |
| 0.0039937156877988 | 0.0037133984816854 | 0.5043799855145276 | T | T | T |
| 0.6745257397463730 | 0.3341283617525495 | 0.6794480601241408 | T | T | T |
| 0.2642861409035096 | 0.7470504093418734 | 0.3955675566658693 | T | T | T |
| 0.9220911234714897 | 0.0776348416031255 | 0.5626817437555339 | T | T | T |

|                     |                    |                    |   |   |   |
|---------------------|--------------------|--------------------|---|---|---|
| 0.5965038035217635  | 0.4226457372570743 | 0.7379557544365833 | T | T | T |
| 0.0145038637222137  | 0.5325240818021814 | 0.3862231803609349 | T | T | T |
| 0.6773929728783107  | 0.8641848914526475 | 0.5473729131161965 | T | T | T |
| 0.3402292937466753  | 0.1921875793527963 | 0.7129067584783673 | T | T | T |
| 0.9363855506655334  | 0.0971060614017957 | 0.3025946657832967 | T | T | T |
| 0.6108368266683095  | 0.4401100293589276 | 0.4761514187946341 | T | T | T |
| 0.2826536213363580  | 0.7762290761928818 | 0.6598401737511594 | T | T | T |
| 0.9112662147139067  | 0.8431109957865041 | 0.3037986543877568 | T | T | T |
| 0.5694053337080077  | 0.1773188157615472 | 0.4757490799821758 | T | T | T |
| 0.2381311511378787  | 0.5096812837185757 | 0.6790511359127807 | T | T | T |
| 0.5223290608155332  | 0.9946105291094589 | 0.3843525081216614 | T | T | T |
| 0.1930350731386574  | 0.3347081855358469 | 0.5471991903026795 | T | T | T |
| 0.8501244415966004  | 0.6655159794600053 | 0.7130863351917477 | T | T | T |
| 0.4233183903591022  | 0.8327863120486415 | 0.2768949674670953 | T | T | T |
| 0.0777412769715712  | 0.1604980722393209 | 0.4461328745287457 | T | T | T |
| 0.7419621532309965  | 0.4863012570330059 | 0.6151614432827940 | T | T | T |
| 0.4043452855981714  | 0.0729014319150496 | 0.3058749225467147 | T | T | T |
| 0.0637861871305776  | 0.3986258475906531 | 0.4697365077392745 | T | T | T |
| 0.7252212399142355  | 0.7337249449169353 | 0.6394638139661328 | T | T | T |
| -0.0023078605202261 | 0.7269200734015320 | 0.3706892406219289 | T | T | T |
| 0.6687571439352593  | 0.0629162330338892 | 0.5382406305370647 | T | T | T |
| 0.7268835879710441  | 0.2324741360038904 | 0.3573509531000058 | T | T | T |
| 0.3947785569821555  | 0.5692862593216510 | 0.5373918977203190 | T | T | T |
| 0.0715413897715106  | 0.9087221028053151 | 0.7063572053730161 | T | T | T |
| 0.6730114341955316  | 0.6048590243560795 | 0.3062416566789469 | T | T | T |
| 0.3388062611628994  | 0.9438962628605242 | 0.4710673716661917 | T | T | T |
| 0.0132998588103071  | 0.2805999811065202 | 0.6397151940953446 | T | T | T |
| 0.7340112713023494  | 0.0108719463176593 | 0.3685424032394273 | T | T | T |
| 0.3973487223613271  | 0.3400761362226046 | 0.5370926446663191 | T | T | T |
| 0.0724587518577654  | 0.6717277144244845 | 0.7048421464775475 | T | T | T |

|                    |                     |                    |   |   |   |
|--------------------|---------------------|--------------------|---|---|---|
| 0.4887704614396265 | 0.7428610772651693  | 0.3950527205454996 | T | T | T |
| 0.1606387183026182 | 0.0866550848111183  | 0.5627923731889557 | T | T | T |
| 0.8316563602416440 | 0.4128666651214714  | 0.7297336691706342 | T | T | T |
| 0.5100152535798298 | 0.2822556459652611  | 0.3577537700286668 | T | T | T |
| 0.1828096484558704 | 0.6094088150122431  | 0.5393775009493502 | T | T | T |
| 0.8431661320115843 | 0.9358023901928285  | 0.7060430058289178 | T | T | T |
| 0.1642680001235632 | 0.0710831804949937  | 0.3041040062311811 | T | T | T |
| 0.8312520546717500 | 0.3970548187192278  | 0.4763859772291726 | T | T | T |
| 0.5014875533116033 | 0.7296930872849732  | 0.6533471012730282 | T | T | T |
| 0.9349780783381046 | 0.3361843427423777  | 0.3052607463647556 | T | T | T |
| 0.6083157136135234 | 0.6674627483025480  | 0.4742755801602746 | T | T | T |
| 0.2748428430930833 | -0.0007609884002163 | 0.6419646842261687 | T | T | T |
| 0.6667929168132796 | 0.8189132037536505  | 0.2960518696417333 | T | T | T |
| 0.3313992307095981 | 0.1457471296445375  | 0.4619640498807437 | T | T | T |
| 0.9990251653662430 | 0.4767155626652308  | 0.6268071795690365 | T | T | T |
| 0.2605506933867944 | 0.5202437827602030  | 0.3916275910223312 | T | T | T |
| 0.9300101386654793 | 0.8474774328554371  | 0.5634358986054979 | T | T | T |
| 0.5865283069275358 | 0.1784004024869136  | 0.7299776996340243 | T | T | T |
| 0.4758273053670765 | 0.4865784777874398  | 0.3837925282345007 | T | T | T |
| 0.1461279714107384 | 0.8161200397044345  | 0.5490286236494727 | T | T | T |
| 0.8198868263179854 | 0.1565993666681503  | 0.7121215086310793 | T | T | T |
| 0.4135213430408057 | 0.5848542759392120  | 0.2745398586995045 | T | T | T |
| 0.0867433892259270 | 0.9294685990124913  | 0.4476799624331705 | T | T | T |
| 0.7472704118887648 | 0.2590584106761942  | 0.6117025645019378 | T | T | T |
| 0.2812406967470154 | 0.2745791899647781  | 0.3680216633061706 | T | T | T |
| 0.9430540108074982 | 0.6078830088518101  | 0.5420657718935731 | T | T | T |
| 0.6047828649675943 | 0.9373721567594679  | 0.7044951795507617 | T | T | T |
| 0.1746939642854034 | 0.5951024793038814  | 0.2761147542076574 | T | T | T |
| 0.8482586707952612 | 0.9215630433159110  | 0.4459002851328368 | T | T | T |
| 0.5194686242141857 | 0.2691924055808380  | 0.6142948943701896 | T | T | T |

|                    |                    |                    |   |   |   |
|--------------------|--------------------|--------------------|---|---|---|
| 0.1555983539760925 | 0.3408857336552922 | 0.2955682032109437 | T | T | T |
| 0.8177894215186914 | 0.6761348911663900 | 0.4625937347041004 | T | T | T |
| 0.4860587927685857 | 0.0143129783994530 | 0.6249692428492900 | T | T | T |
| 0.1895254145439798 | 0.8520902190762267 | 0.2976085176347621 | T | T | T |
| 0.8641328235998710 | 0.1904958798964686 | 0.4609358765658083 | T | T | T |
| 0.5230456312614887 | 0.5135410841872475 | 0.6343171558039821 | T | T | T |
| 0.7758924706410670 | 0.4986572640604913 | 0.3568643903054694 | T | T | T |
| 0.4372046495665776 | 0.8299315483200400 | 0.5357308199605169 | T | T | T |
| 0.0969018163064836 | 0.1626327936930012 | 0.7077442873214724 | T | T | T |
| 0.5964600657008317 | 0.4180987675756427 | 0.7921030553679790 | T | T | T |

**Table S16** Optimized fractional coordinates of the  $\text{In}_2\text{O}_3(111)$ -S3 surface.

In O H

|                     |                     |                     |
|---------------------|---------------------|---------------------|
| 1.0000000000000000  |                     |                     |
| 12.5091307398836005 | -7.2221500000000001 | 0.0000000000000000  |
| 0.0000000000000000  | 14.4443000000000001 | 0.0000000000000000  |
| 0.0000000000000000  | 0.0000000000000000  | 17.9854999999999983 |

In O H  
48 71 1

Selective dynamics

Direct

|                    |                    |                    |   |   |   |
|--------------------|--------------------|--------------------|---|---|---|
| 0.8506463464963628 | 0.4056261955878484 | 0.3546495922565455 | T | T | T |
| 0.5154601096529240 | 0.7420766380056438 | 0.5086733447650146 | T | T | T |
| 0.1830122766555197 | 0.0717250880895559 | 0.6804254053357925 | T | T | T |
| 0.8278648461882825 | 0.9291601764932231 | 0.3268750647021029 | T | T | T |
| 0.4950341643382848 | 0.2703721754564851 | 0.4948992888496196 | T | T | T |
| 0.1623099271744916 | 0.6047318203060418 | 0.6592732048350292 | T | T | T |
| 0.3222765449681435 | 0.4345478012024994 | 0.3276346703735301 | T | T | T |
| 0.9932190414364851 | 0.7625440465199798 | 0.4926143526960584 | T | T | T |
| 0.6586482873999649 | 0.1003472643514934 | 0.6690656032239291 | T | T | T |
| 0.8338487355333678 | 0.6774573761259161 | 0.3418336815778998 | T | T | T |
| 0.5048283761193506 | 0.0047478296085211 | 0.5031612420022166 | T | T | T |
| 0.1869921599363675 | 0.3440108631739235 | 0.6710086451940787 | T | T | T |
| 0.1171293978629840 | 0.6867049833187581 | 0.3312763965686009 | T | T | T |
| 0.7748998006277945 | 0.0156062634811208 | 0.4906001411096493 | T | T | T |
| 0.4457934742692691 | 0.3461924352770312 | 0.6643044077866992 | T | T | T |
| 0.6034065526201543 | 0.4512365193665731 | 0.3558172944875280 | T | T | T |
| 0.2704440899774249 | 0.7785729584100015 | 0.5093859282180329 | T | T | T |
| 0.9187998054682275 | 0.1004380534402989 | 0.6811787044923054 | T | T | T |
| 0.0976095726580455 | 0.4451497438830387 | 0.3338367473422164 | T | T | T |
| 0.7631046829879460 | 0.7738950259540566 | 0.5182460623309646 | T | T | T |
| 0.4372379219438200 | 0.1178959588243282 | 0.6762797191530350 | T | T | T |
| 0.0789605394101329 | 0.9026211371062000 | 0.3279089310271517 | T | T | T |
| 0.7394714373007536 | 0.2287648870438695 | 0.4974544651703384 | T | T | T |
| 0.4033116102196605 | 0.5695920608527266 | 0.6549270914674670 | T | T | T |
| 0.5626370166749723 | 0.6581492682598172 | 0.3361965686849178 | T | T | T |
| 0.2340849257078298 | 0.9923319835210277 | 0.5166729593535491 | T | T | T |
| 0.8949066380734796 | 0.3230636610698260 | 0.6773892809099975 | T | T | T |
| 0.8487360133604991 | 0.1755153963158840 | 0.3410702909679468 | T | T | T |
| 0.5000231099987255 | 0.5046640702381436 | 0.5049729852870638 | T | T | T |
| 0.1619846734679824 | 0.8309425075010990 | 0.6683357386752721 | T | T | T |
| 0.5598233784726274 | 0.1588733905817076 | 0.3534245360001504 | T | T | T |
| 0.2290657013191128 | 0.4949019950118201 | 0.5014535457494482 | T | T | T |
| 0.9019233288767350 | 0.8253361183724358 | 0.6827196036432095 | T | T | T |
| 0.1054575276384459 | 0.1808235329157981 | 0.3275289030338984 | T | T | T |

|                     |                    |                    |   |   |   |
|---------------------|--------------------|--------------------|---|---|---|
| 0.7797503530294088  | 0.5140251683221735 | 0.4985514092691717 | T | T | T |
| 0.4509906579593838  | 0.8540453246000822 | 0.6554245074571963 | T | T | T |
| 0.5737652627933505  | 0.8918891943078027 | 0.3301054314575941 | T | T | T |
| 0.2443459126320454  | 0.2351760327877881 | 0.4919491895143429 | T | T | T |
| 0.9106872987525664  | 0.5641433213243281 | 0.6698970727223880 | T | T | T |
| 0.3507024374283477  | 0.9103597669866453 | 0.3381328177380504 | T | T | T |
| 0.0171543901472253  | 0.2462380038746732 | 0.5192556313472644 | T | T | T |
| 0.6844826779862851  | 0.5725770229142749 | 0.6796727061288220 | T | T | T |
| 0.3302109817060986  | 0.1602509468591977 | 0.3415838856014830 | T | T | T |
| 0.0058908301725933  | 0.5042202964597867 | 0.5053515515663121 | T | T | T |
| 0.6758039216344734  | 0.8474420644170072 | 0.6679648773796171 | T | T | T |
| 0.3375292521451185  | 0.6716758473367963 | 0.3168065832436483 | T | T | T |
| 0.0034974539775247  | 0.0033872274260669 | 0.5048858214046587 | T | T | T |
| 0.6733367038682712  | 0.3382500822722022 | 0.6862300231801627 | T | T | T |
| 0.2646672887966252  | 0.7474779964033144 | 0.3937293330765953 | T | T | T |
| 0.9220136569566445  | 0.0775476133154695 | 0.5636612148602730 | T | T | T |
| 0.5919907773436309  | 0.4203723663283506 | 0.7304324997263762 | T | T | T |
| 0.0147539554527588  | 0.5322190592628495 | 0.3842439119388231 | T | T | T |
| 0.6778154350967414  | 0.8637138590333520 | 0.5473809170287056 | T | T | T |
| 0.3402887691933370  | 0.1925170287036762 | 0.7116076212719837 | T | T | T |
| 0.9370180606752226  | 0.0974608992810578 | 0.3043556533132380 | T | T | T |
| 0.6106870771703675  | 0.4414783576734604 | 0.4772542968118894 | T | T | T |
| 0.2834442506427463  | 0.7778899737180948 | 0.6573088279317452 | T | T | T |
| 0.9111728246525594  | 0.8431469484017905 | 0.3042947776553719 | T | T | T |
| 0.5706868870775949  | 0.1777492962551381 | 0.4743044768200050 | T | T | T |
| 0.2433383493120098  | 0.5202914709548961 | 0.6823186162462697 | T | T | T |
| 0.5227293600788322  | 0.9950337554025008 | 0.3827881771536988 | T | T | T |
| 0.1939806870069778  | 0.3391417461635722 | 0.5467204386208786 | T | T | T |
| 0.8506888550953697  | 0.6657345912927186 | 0.7145242787873713 | T | T | T |
| 0.4234545439298196  | 0.8338237097858904 | 0.2748533065619999 | T | T | T |
| 0.0788053426587964  | 0.1612413284910732 | 0.4480538406438795 | T | T | T |
| 0.7472406031118258  | 0.4896699911971989 | 0.6148415349705112 | T | T | T |
| 0.4046670404856851  | 0.0745290687894664 | 0.3057580046715333 | T | T | T |
| 0.0626693888393887  | 0.3980462510227564 | 0.4688605212663370 | T | T | T |
| 0.7227594587624618  | 0.7290909876514943 | 0.6404326397932688 | T | T | T |
| -0.0017234451111047 | 0.7275194118715800 | 0.3704657567002254 | T | T | T |
| 0.6694140551788668  | 0.0636593263653199 | 0.5382889517576194 | T | T | T |
| 0.7275471553716916  | 0.2329373349231393 | 0.3557805878407493 | T | T | T |
| 0.3933236090257481  | 0.5731630283921381 | 0.5345909766171333 | T | T | T |
| 0.0724508434408183  | 0.9067755812732190 | 0.7059143442681814 | T | T | T |
| 0.6729135449590704  | 0.6050066253320859 | 0.3065626661885164 | T | T | T |
| 0.3396052527581990  | 0.9447536824180762 | 0.4693621661330029 | T | T | T |
| 0.0158987988664434  | 0.2747530918455366 | 0.6445374858975730 | T | T | T |
| 0.7339785384211058  | 0.0109958604008441 | 0.3687119972342376 | T | T | T |

|                    |                    |                    |   |   |   |
|--------------------|--------------------|--------------------|---|---|---|
| 0.3988327823996370 | 0.3402521639223540 | 0.5397854541470184 | T | T | T |
| 0.0722663374663902 | 0.6712668774279485 | 0.7038127782648518 | T | T | T |
| 0.4887926327893160 | 0.7436457950178335 | 0.3927070222367797 | T | T | T |
| 0.1588979471240894 | 0.0881699866552698 | 0.5653577908793428 | T | T | T |
| 0.8346191205560725 | 0.4146781915388627 | 0.7310345524433883 | T | T | T |
| 0.5096541601125741 | 0.2828672139676429 | 0.3591665041003263 | T | T | T |
| 0.1827502350465498 | 0.6103579582917822 | 0.5375626595930239 | T | T | T |
| 0.8404771746460727 | 0.9329276454551642 | 0.7062960536806338 | T | T | T |
| 0.1642923665098603 | 0.0716095188912458 | 0.3050258864064641 | T | T | T |
| 0.8316302600197699 | 0.3971646591986345 | 0.4756885855834783 | T | T | T |
| 0.5018820035084748 | 0.7335689810961712 | 0.6535647758924419 | T | T | T |
| 0.9346997421729842 | 0.3357737549116670 | 0.3041672034652014 | T | T | T |
| 0.6076349295268958 | 0.6673451484081782 | 0.4738951145443625 | T | T | T |
| 0.2770059433878046 | 0.9978859632084509 | 0.6401368484582306 | T | T | T |
| 0.6674102369469134 | 0.8197157190325025 | 0.2950899386453725 | T | T | T |
| 0.3299094358835775 | 0.1460506756924582 | 0.4628284842593886 | T | T | T |
| 0.0011995480200717 | 0.4749428792844502 | 0.6258573023129543 | T | T | T |
| 0.2593211875378088 | 0.5208173606768561 | 0.3881982365097655 | T | T | T |
| 0.9296442850854910 | 0.8472306775117894 | 0.5639942563362373 | T | T | T |
| 0.5859134021089480 | 0.1775588999278927 | 0.7318899527869338 | T | T | T |
| 0.4748826021279380 | 0.4872639656490699 | 0.3841703818767869 | T | T | T |
| 0.1470009696082895 | 0.8170306083941160 | 0.5476924369925554 | T | T | T |
| 0.8185208353973177 | 0.1586288128525813 | 0.7148469812504786 | T | T | T |
| 0.4141422868719816 | 0.5852090443911707 | 0.2730129047718791 | T | T | T |
| 0.0868278185840115 | 0.9305089375467255 | 0.4480694018912832 | T | T | T |
| 0.7470281853217716 | 0.2606988734953061 | 0.6139745657970082 | T | T | T |
| 0.2812454713180582 | 0.2756878859971647 | 0.3691946240467083 | T | T | T |
| 0.9457142614084995 | 0.6085572961406980 | 0.5408718466445496 | T | T | T |
| 0.6067788863909008 | 0.9393750417528085 | 0.7032981831249140 | T | T | T |
| 0.1745687598920098 | 0.5959998947801376 | 0.2734000529365297 | T | T | T |
| 0.8481686443994945 | 0.9215136046428882 | 0.4466523815774541 | T | T | T |
| 0.5202773104855908 | 0.2627747241978764 | 0.6115587062216976 | T | T | T |
| 0.1559531604372238 | 0.3405489109894948 | 0.2939354842774698 | T | T | T |
| 0.8183646206423624 | 0.6764563251207929 | 0.4627249335828132 | T | T | T |
| 0.4869756551269244 | 0.0151748154314521 | 0.6237303346403630 | T | T | T |
| 0.1894378672350988 | 0.8528680285503877 | 0.2967633988818524 | T | T | T |
| 0.8647349799322457 | 0.1908989422249250 | 0.4621442281424719 | T | T | T |
| 0.5137248582808958 | 0.5158676971474713 | 0.6344766373264205 | T | T | T |
| 0.7756729078359276 | 0.4988223611813391 | 0.3570833705253798 | T | T | T |
| 0.4383894762968892 | 0.8316204577619195 | 0.5341178868929196 | T | T | T |
| 0.0807831431424992 | 0.1358578373538771 | 0.7233083106483099 | T | T | T |
| 0.0846470625804093 | 0.1386171160537455 | 0.7776426310088430 | T | T | T |
